# Supplementary material for: The role of lipids in the inception, maintenance and complications of dengue virus infection
Source: PubMed Central journal article supplement (PMC6081433; doi:10.1038/s41598-018-30385-x), 2018-08-07

# The role of lipids in the inception, maintenance and complications of dengue virus infection

Carlos Fernando Odir Rodrigues Melo<sup>1</sup>, Jeany Delafiori<sup>1</sup>, Mohamad Ziad Dabaja<sup>1</sup>, Diogo Noin de Oliveira<sup>1</sup>, Tatiane Melina Guerreiro<sup>1</sup>, Tatiana Elias Colombo<sup>2</sup>, Maurício Lacerda Nogueira<sup>2</sup>, Jose Luiz Proenca-Modena<sup>3</sup>, Rodrigo Ramos Catharino<sup>1\*</sup>

<sup>1</sup>INNOVARE Biomarkers Laboratory, School of Pharmaceutical Sciences, University of Campinas, Brazil.

<sup>2</sup>School of Medicine from São José do Rio Preto (FAMERP), Brazil.

<sup>3</sup>Laboratory of Study of Emerging Viruses (LEVE), Department of Genetic, Evolution and Bioagents, Institute of Biology, University of Campinas, Brazil.

\* Corresponding author: Rodrigo Ramos Catharino

***Supplementary Information #1***  
MS/MS Reactions of the Species Elected by PCA

MS/MS spectrum of 743 m/z

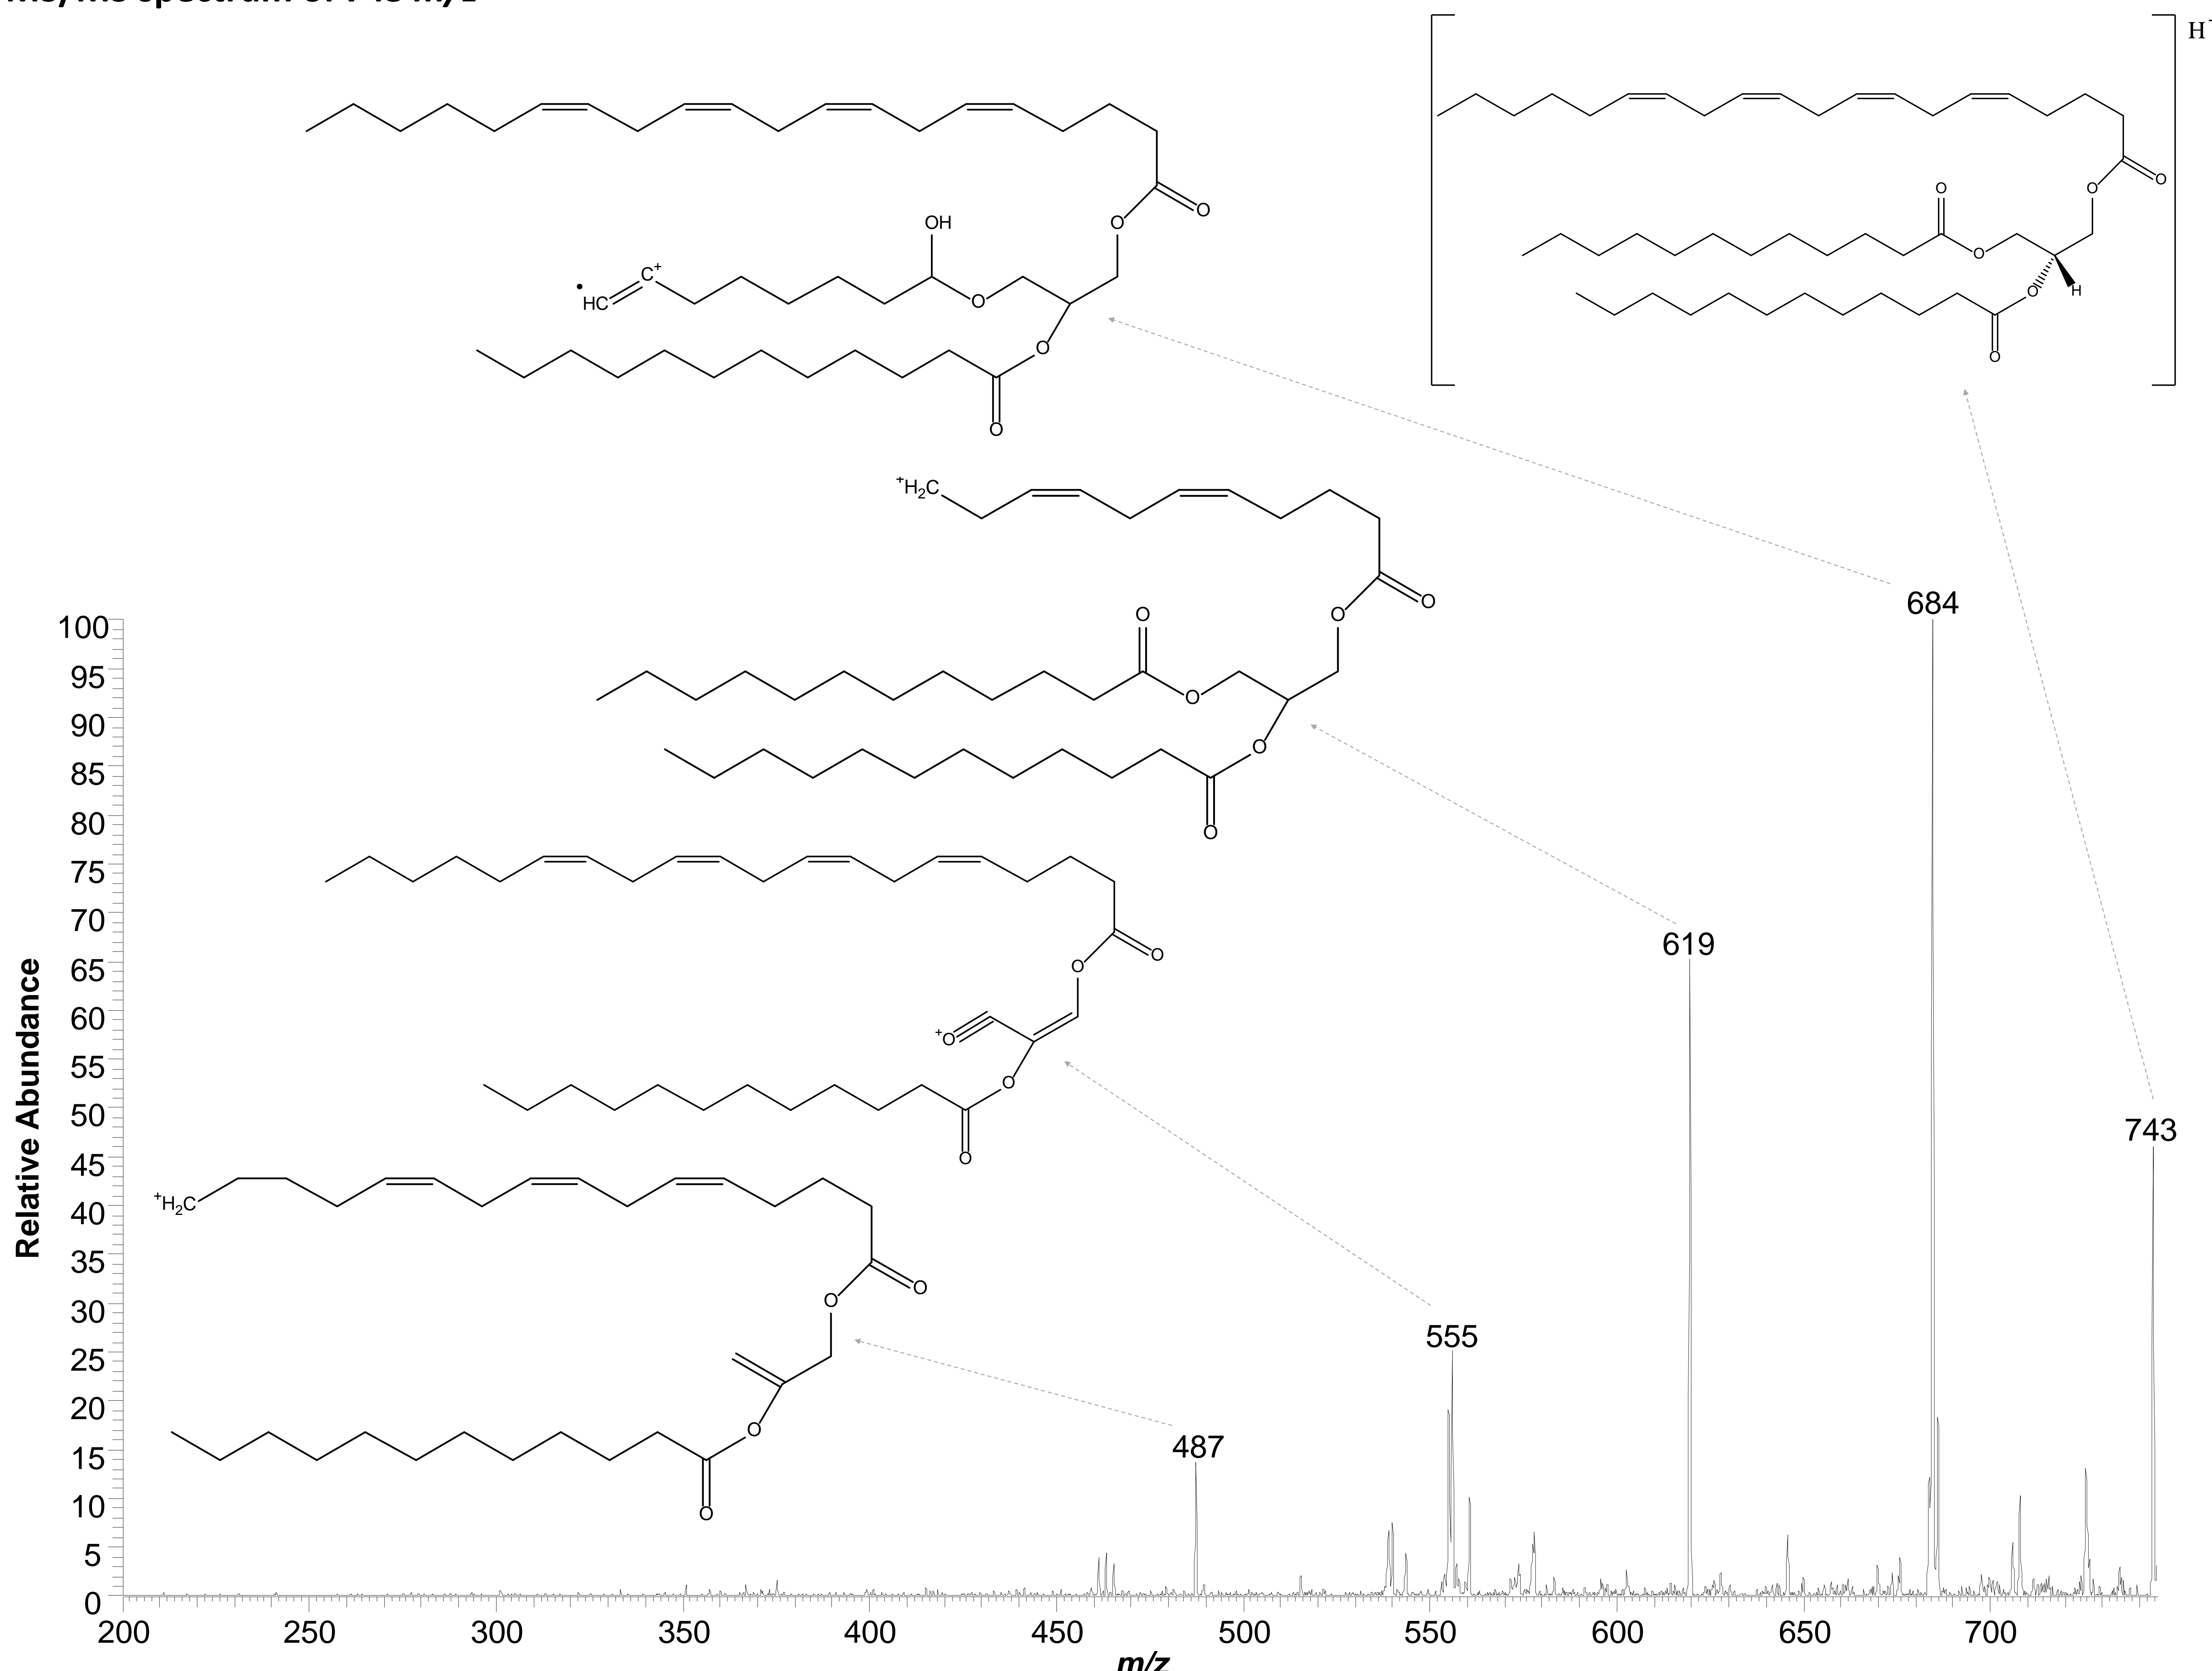

# MS/MS spectrum of 769 m/z

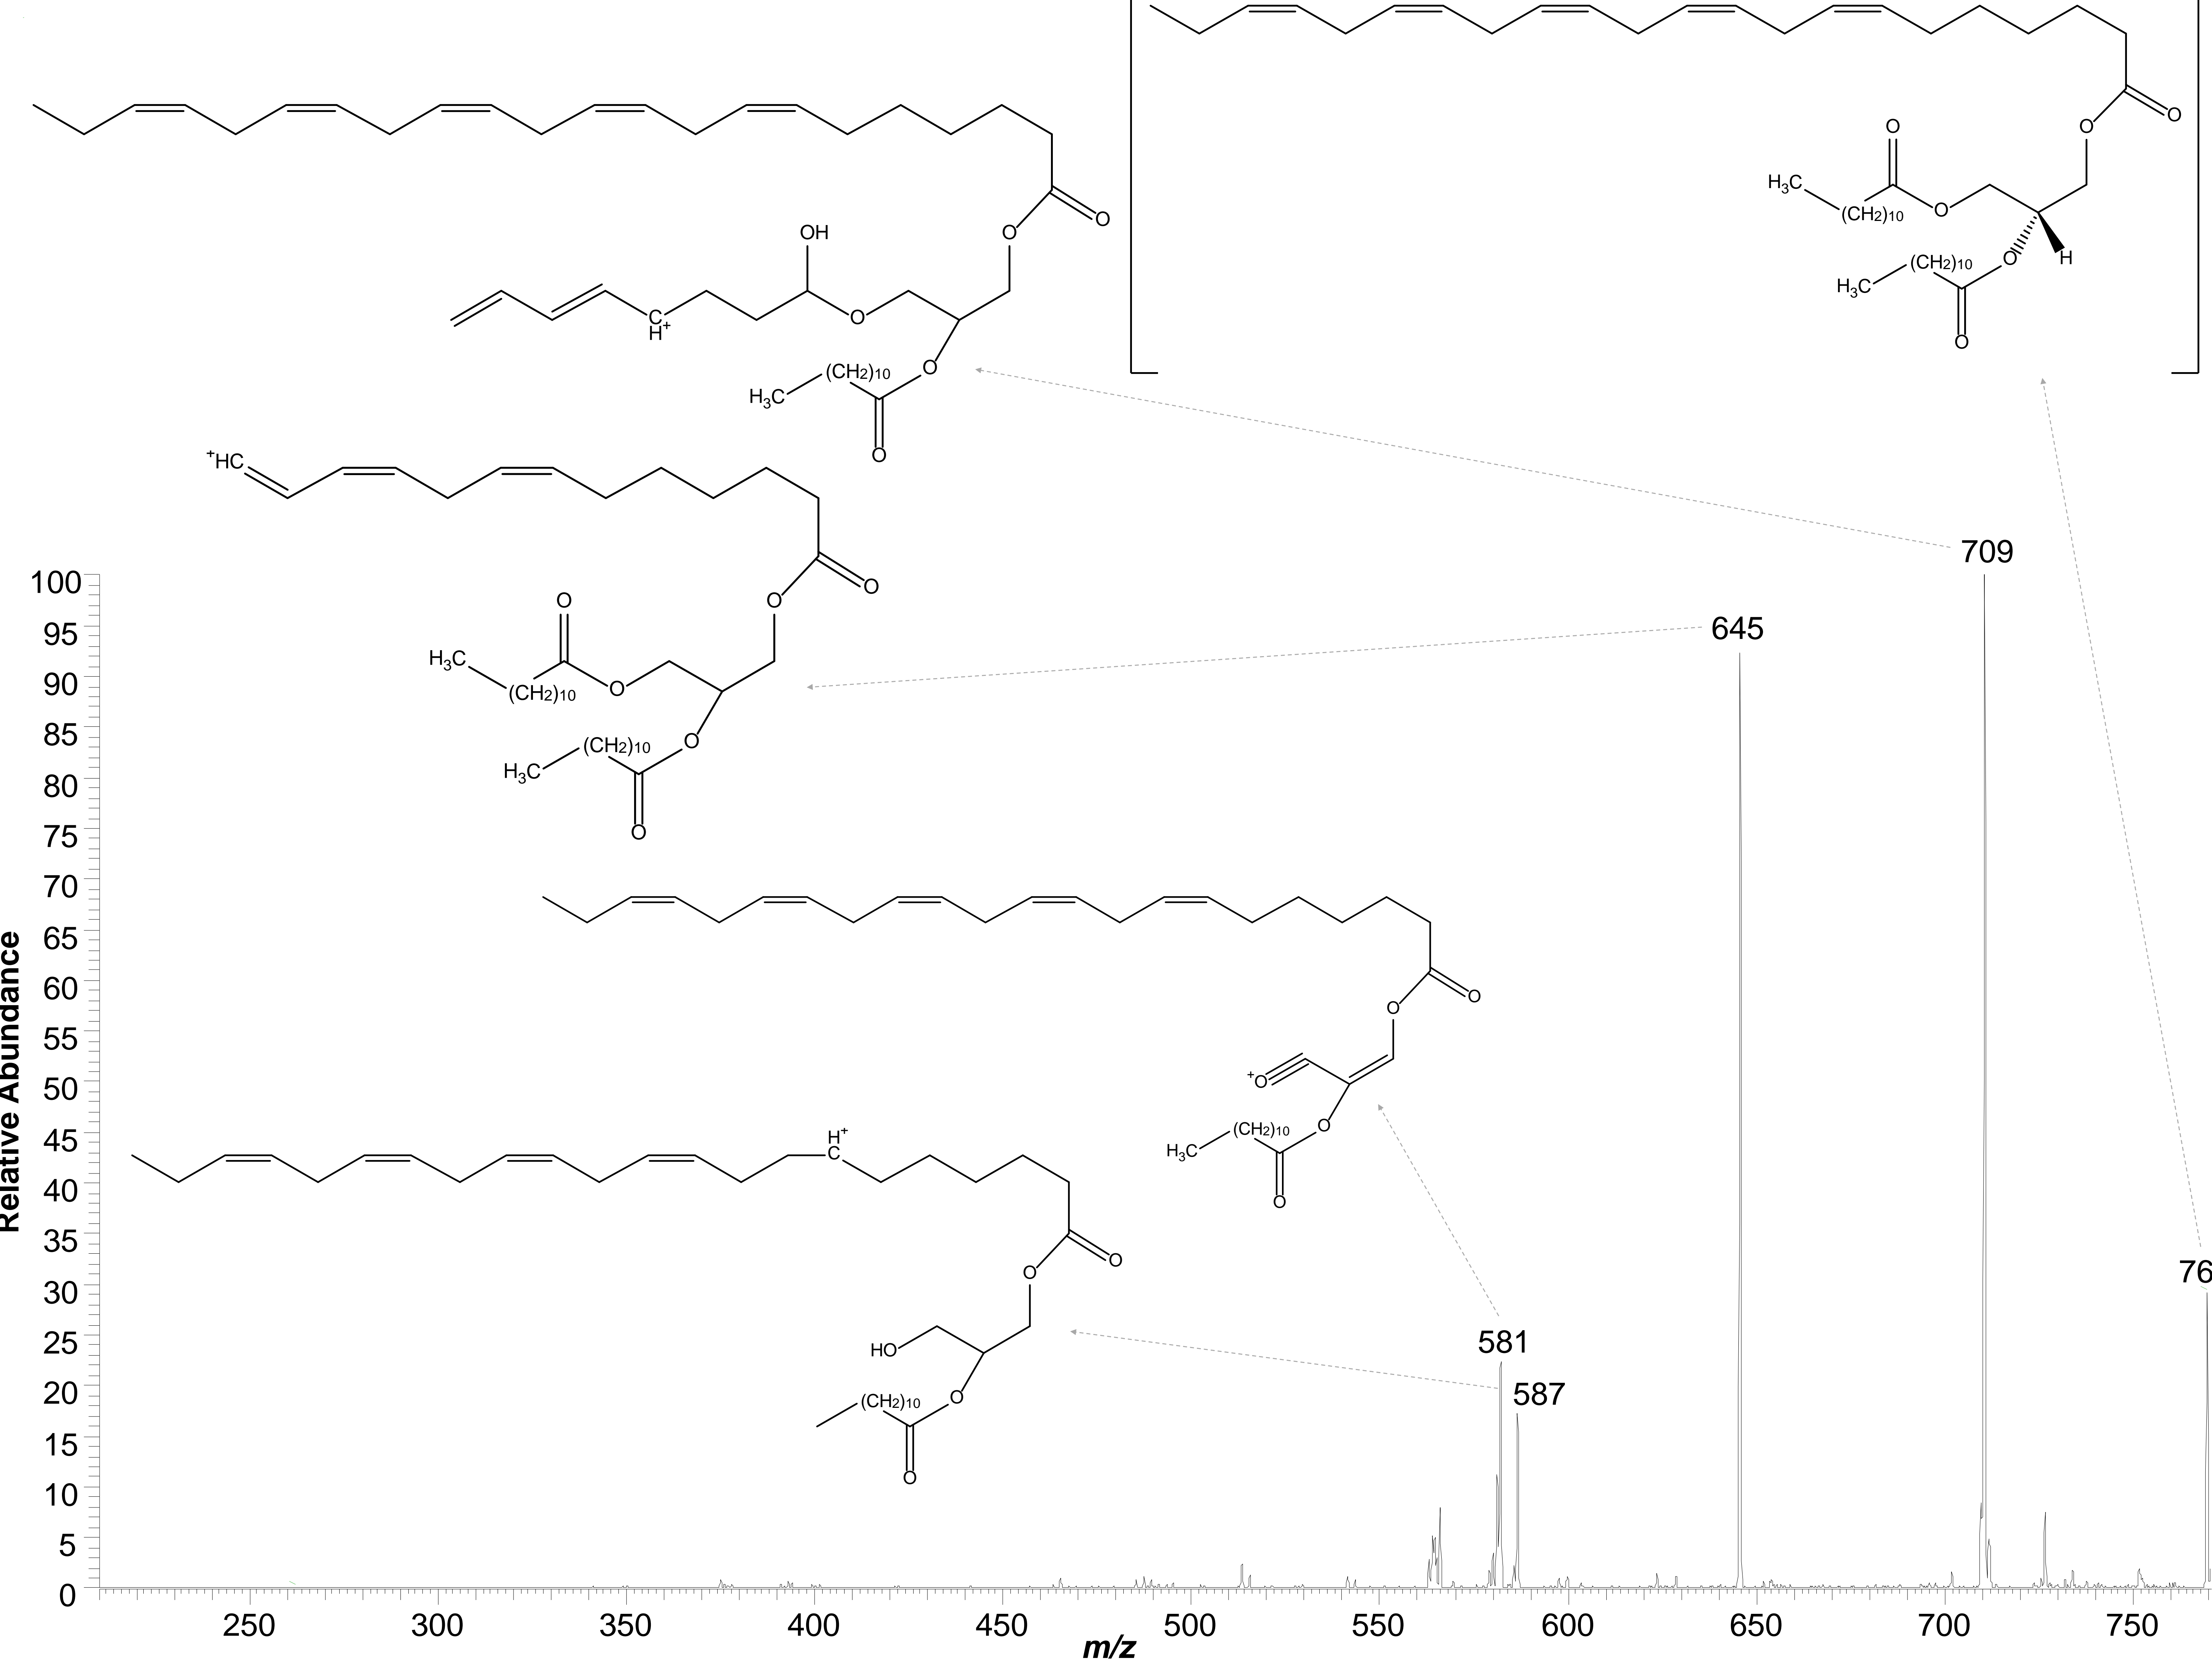

MS/MS spectrum of 795 *m/z*

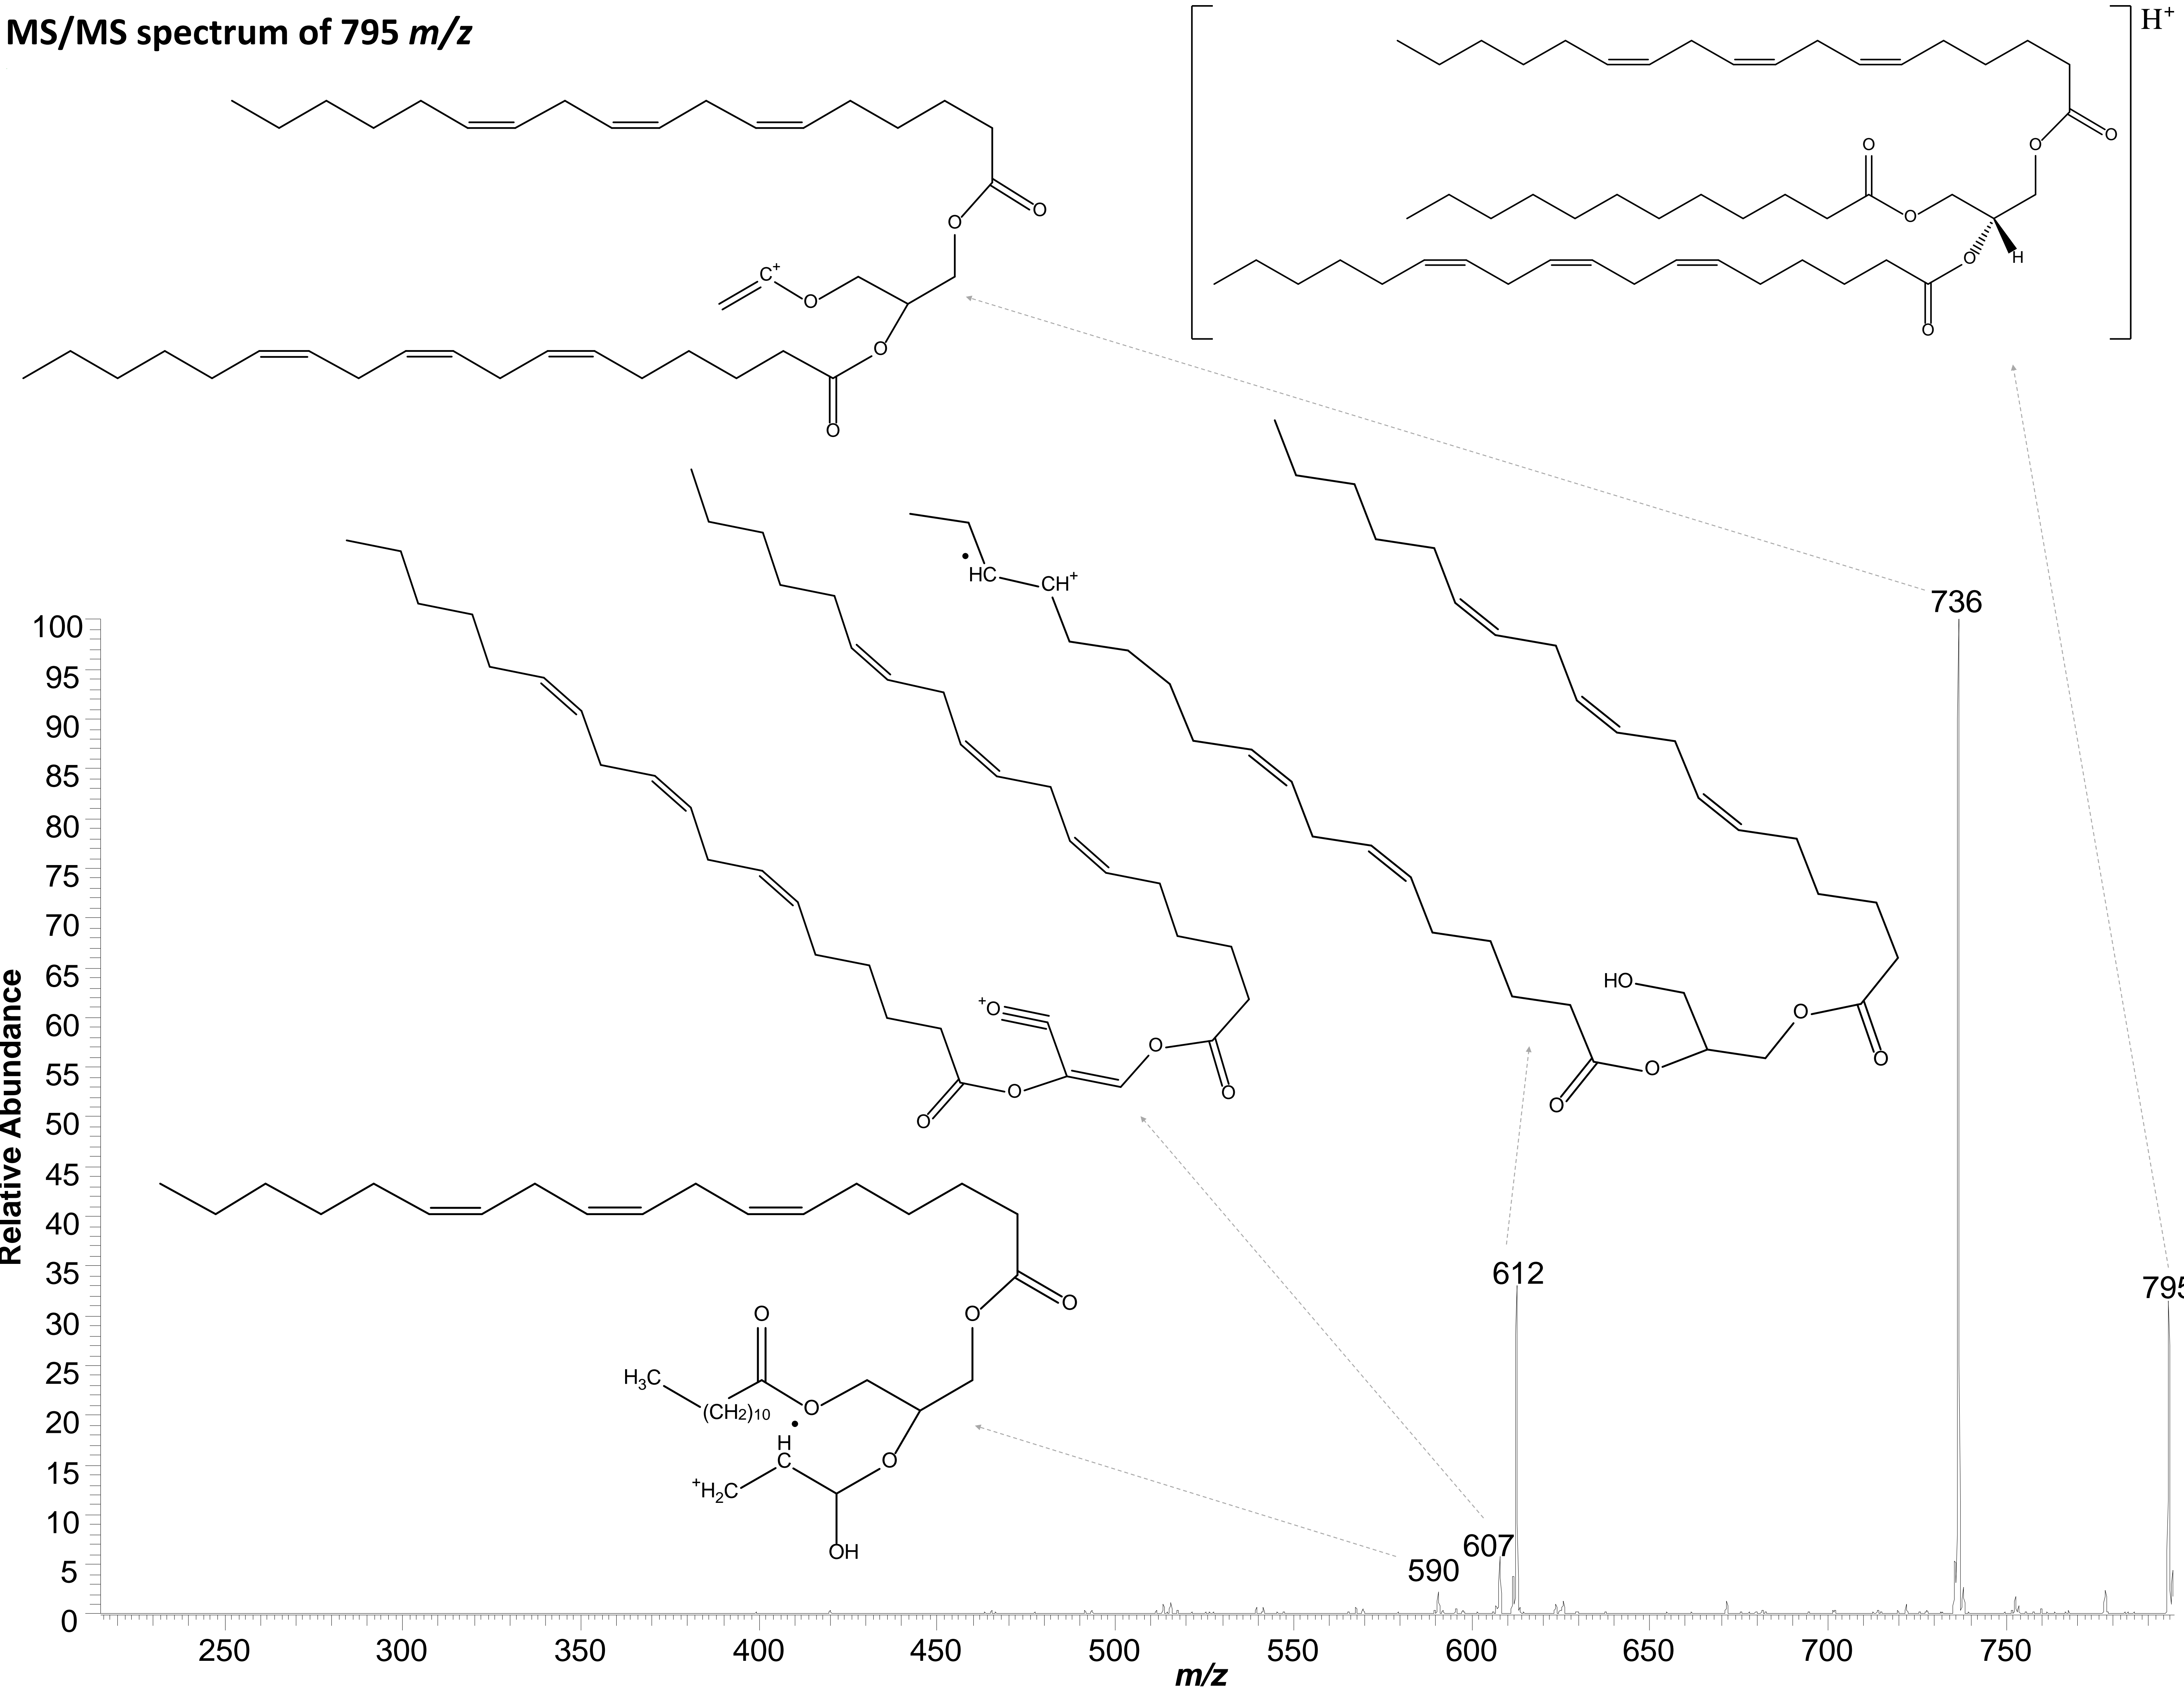

**MS/MS spectrum of 859 *m/z***

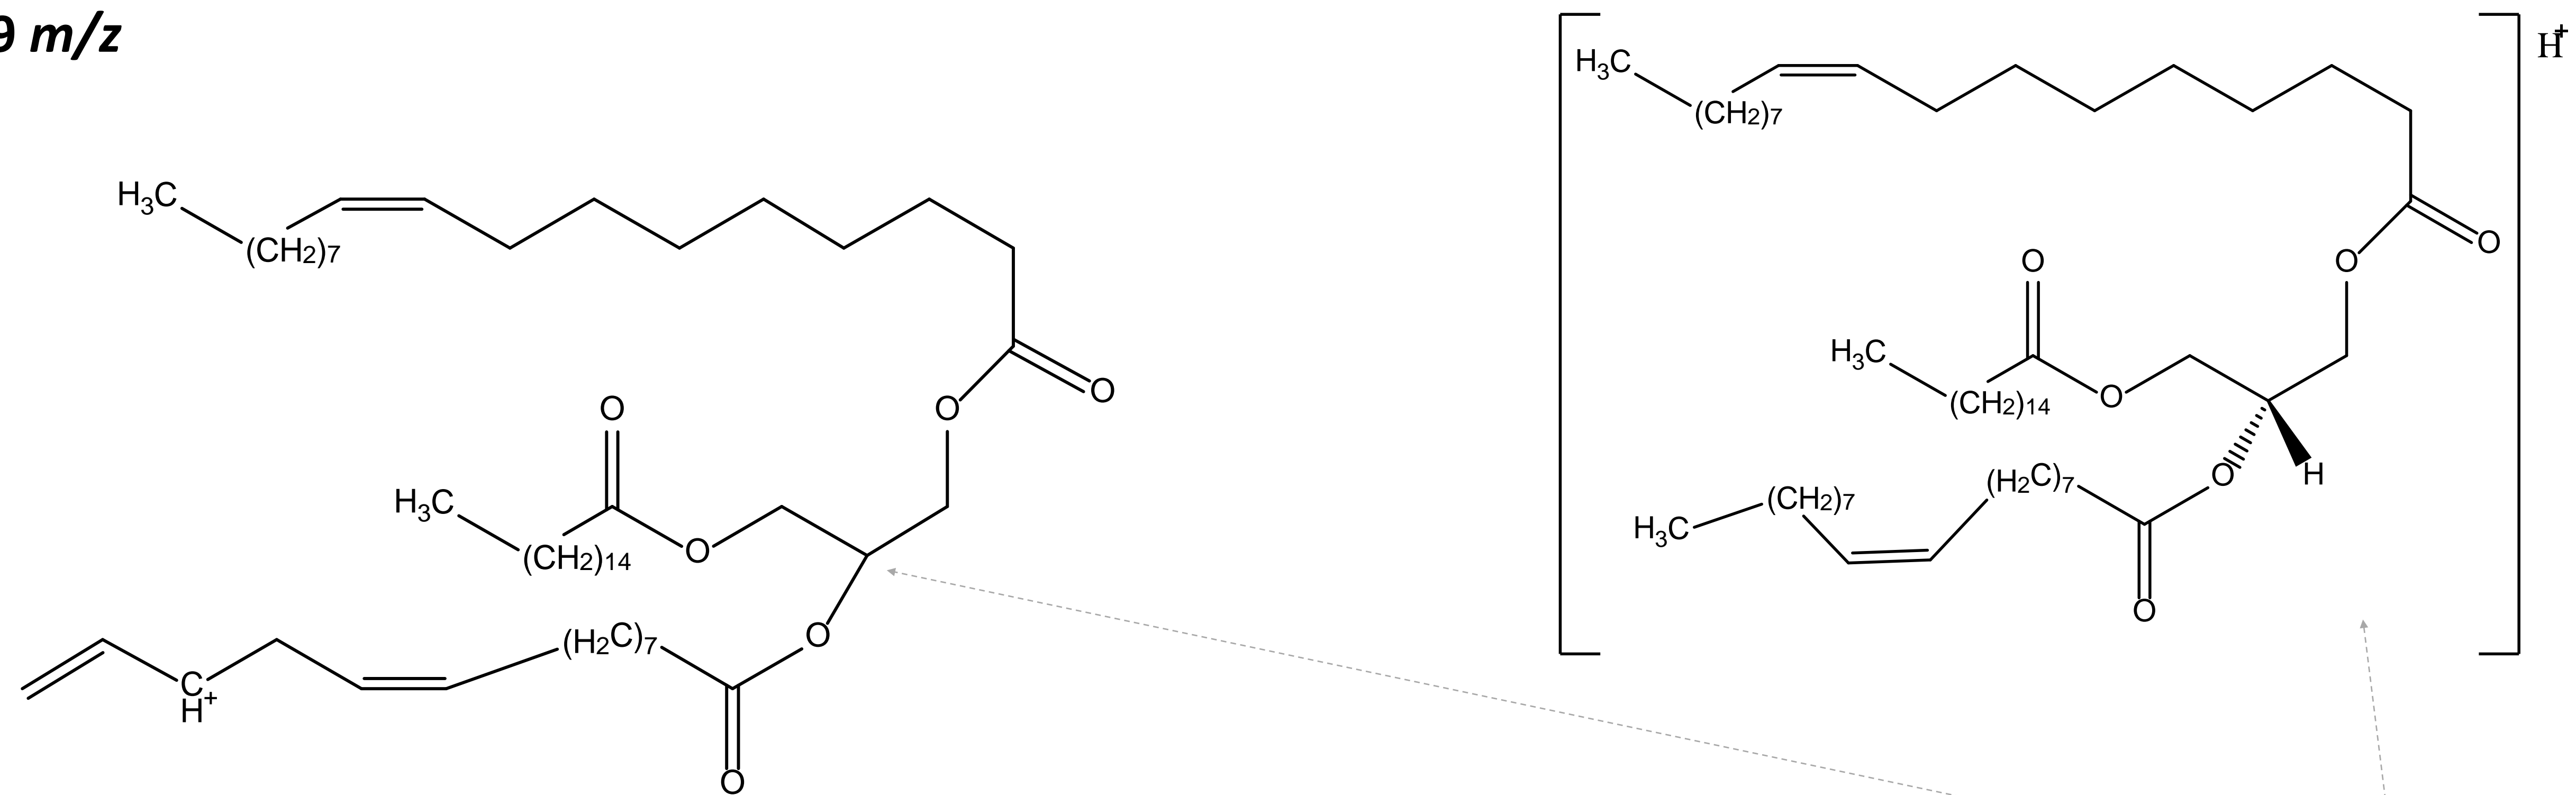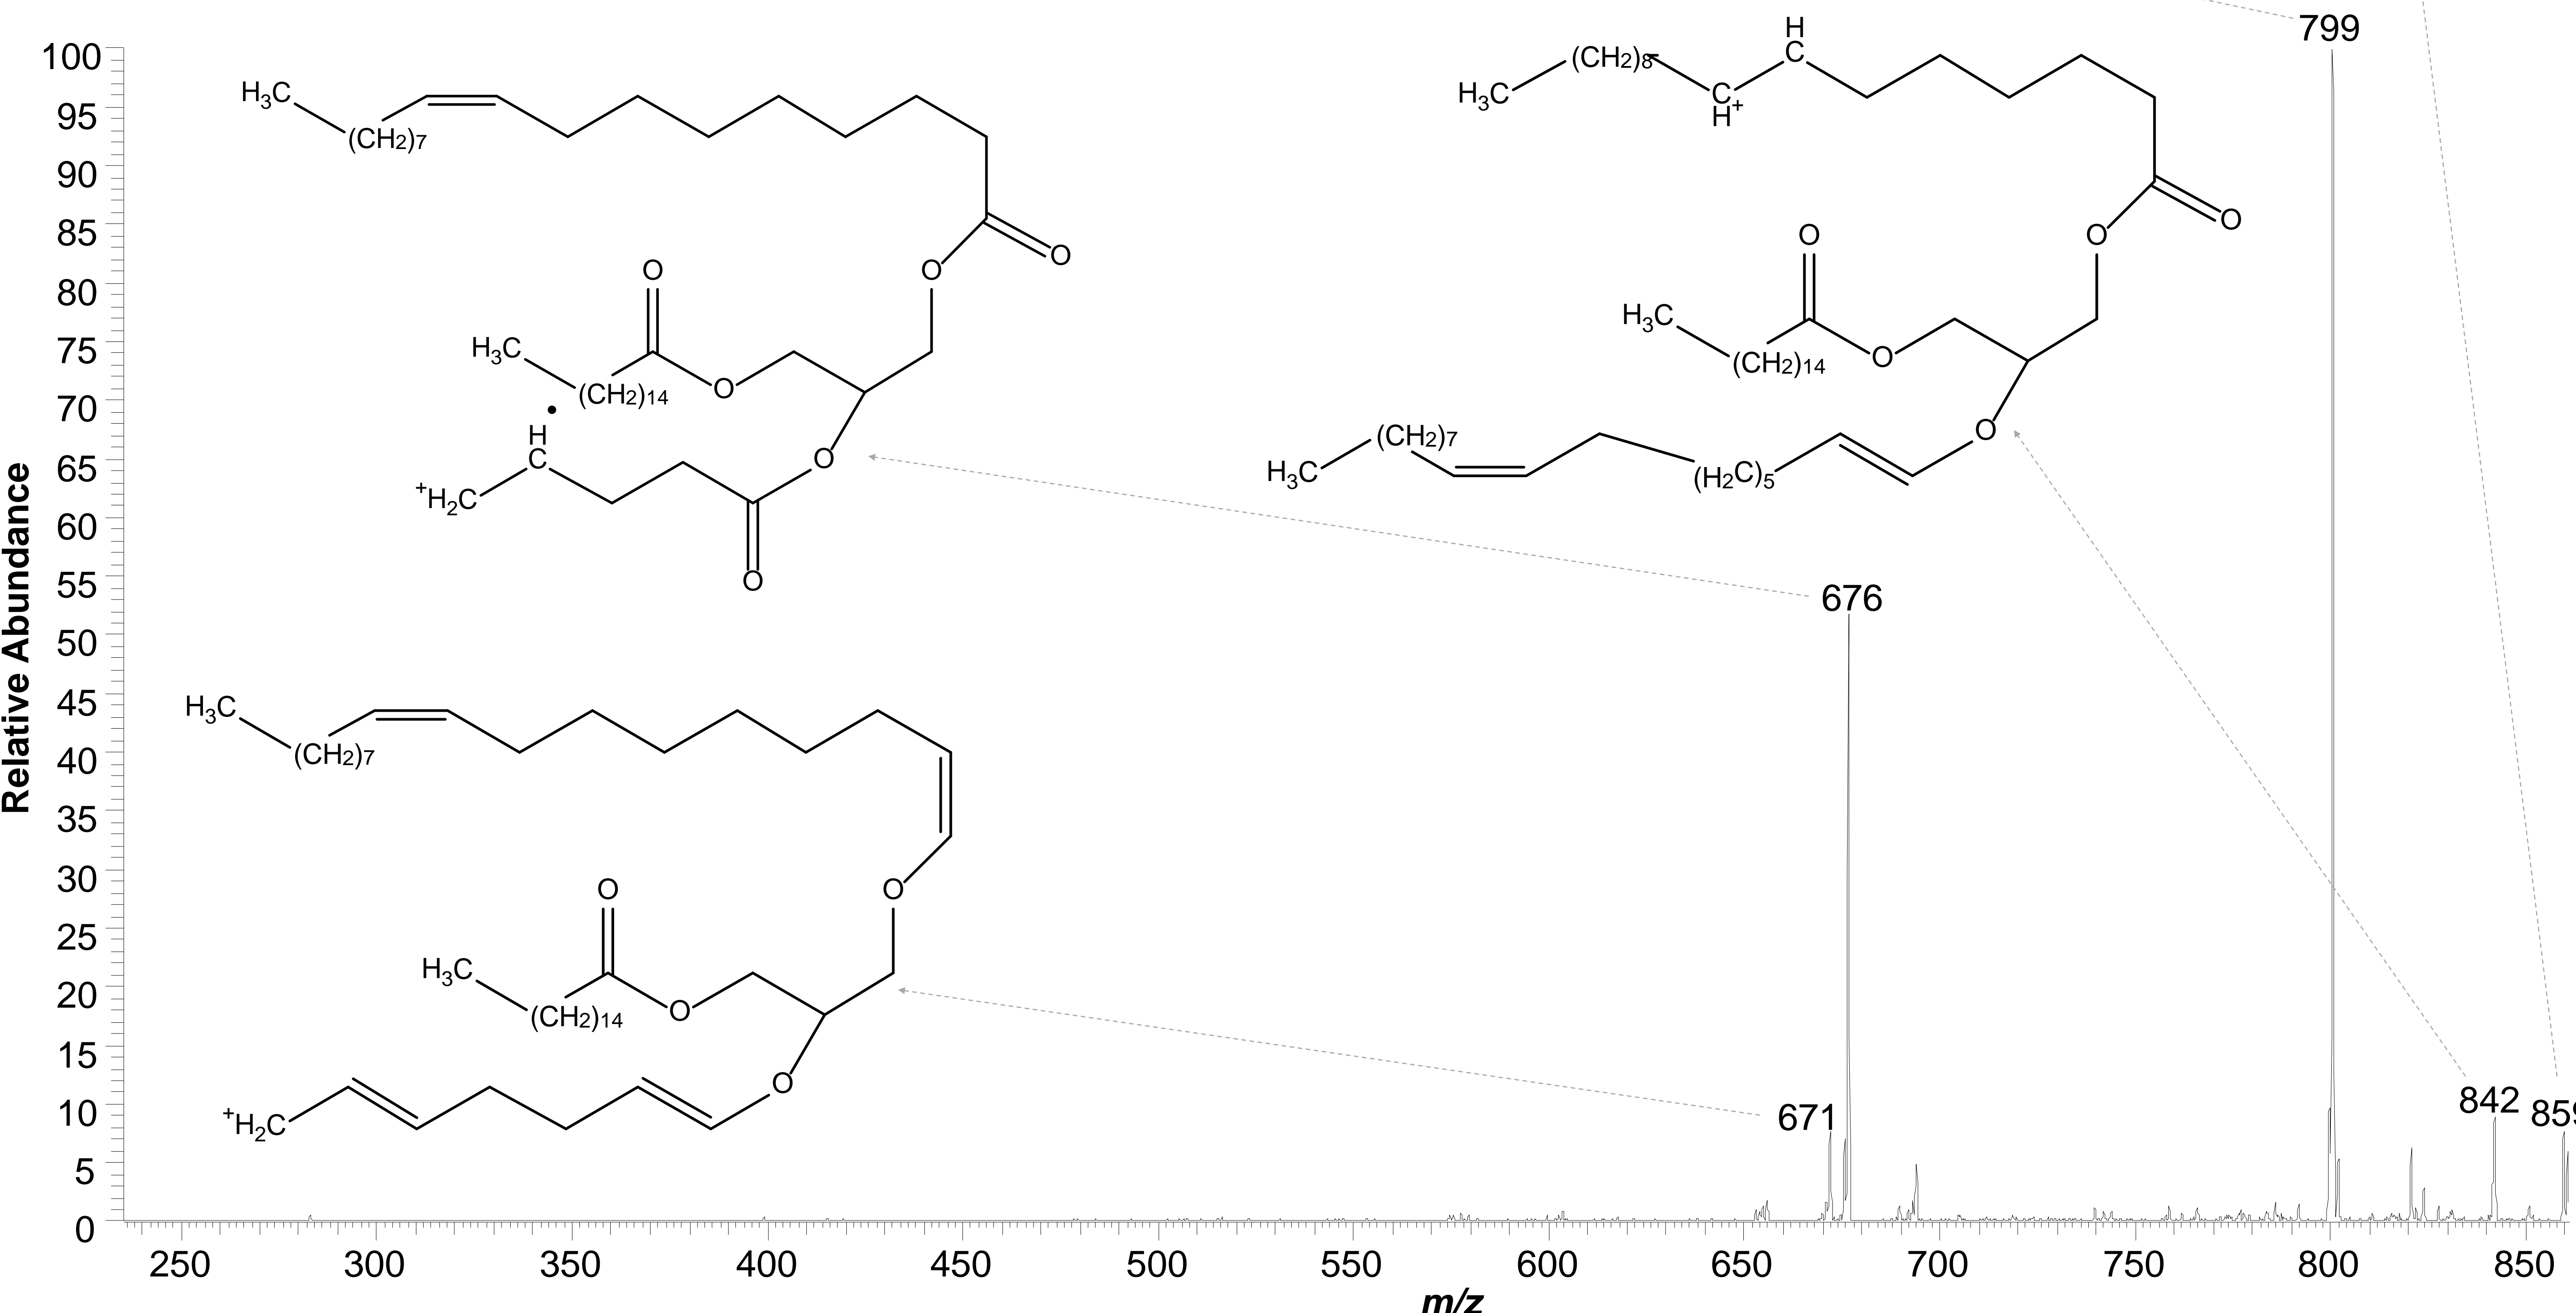

MS/MS spectrum of 762 *m/z*

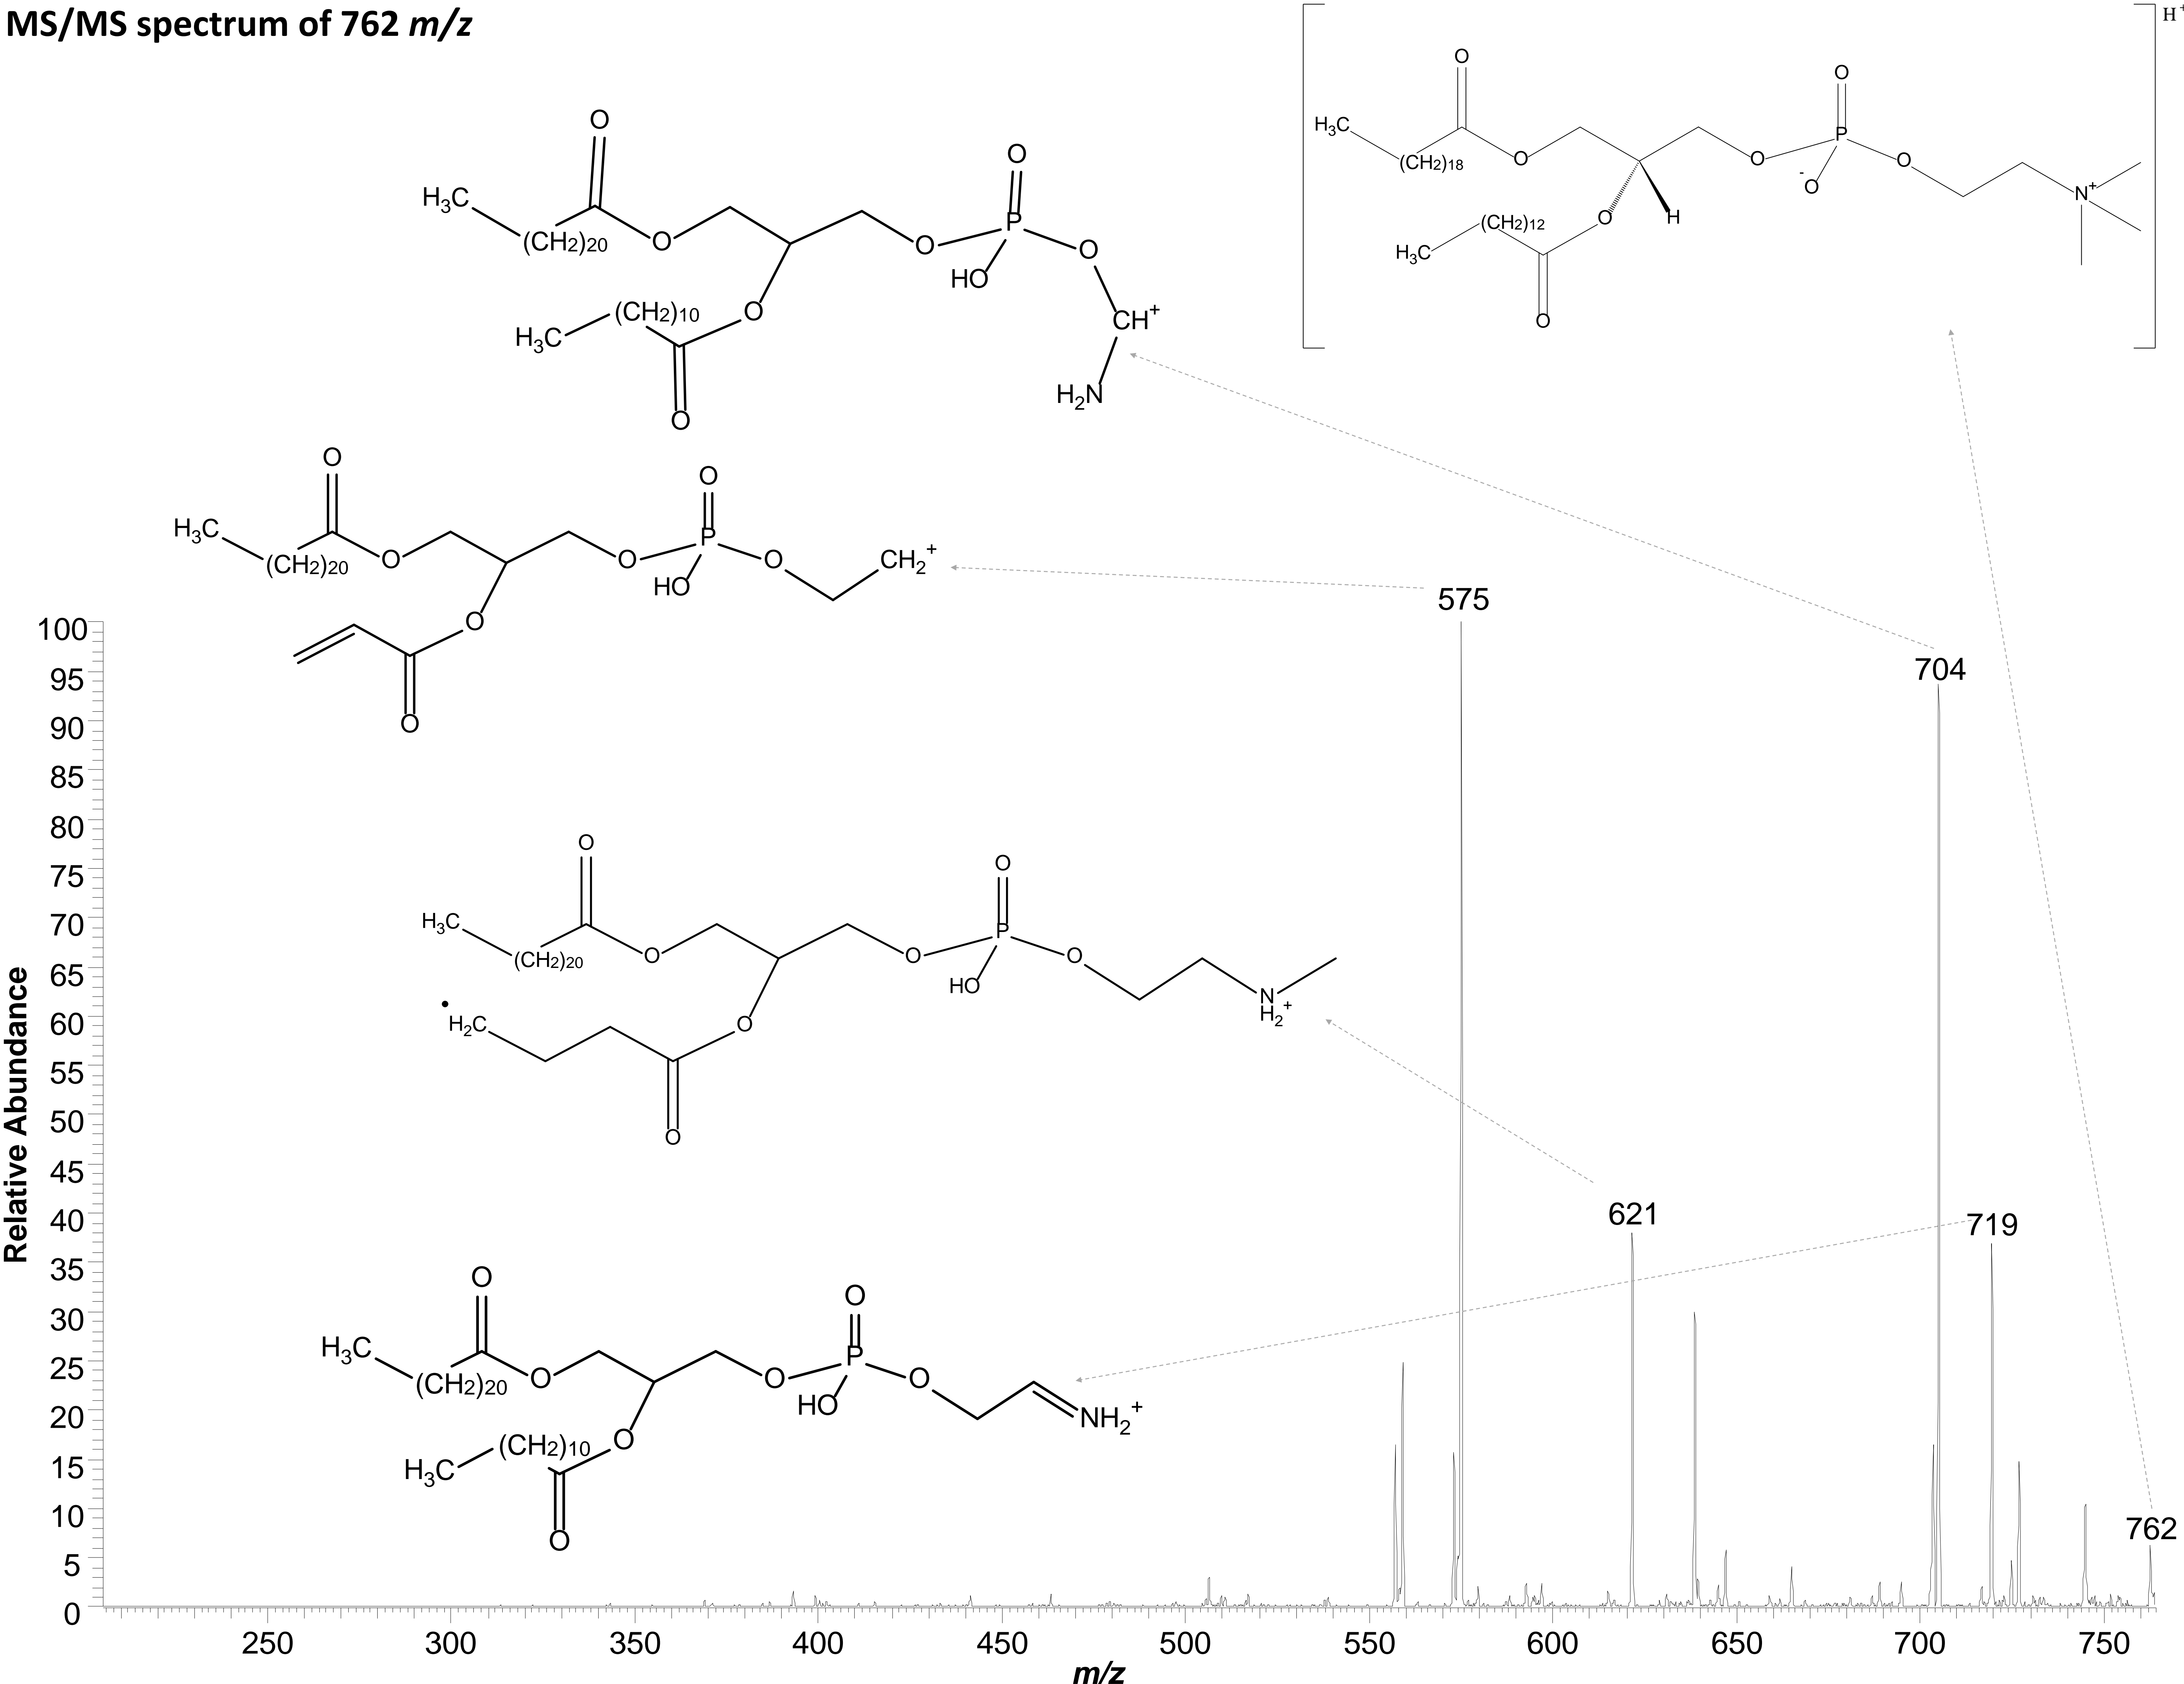



**MS/MS spectrum of 784 m/z**

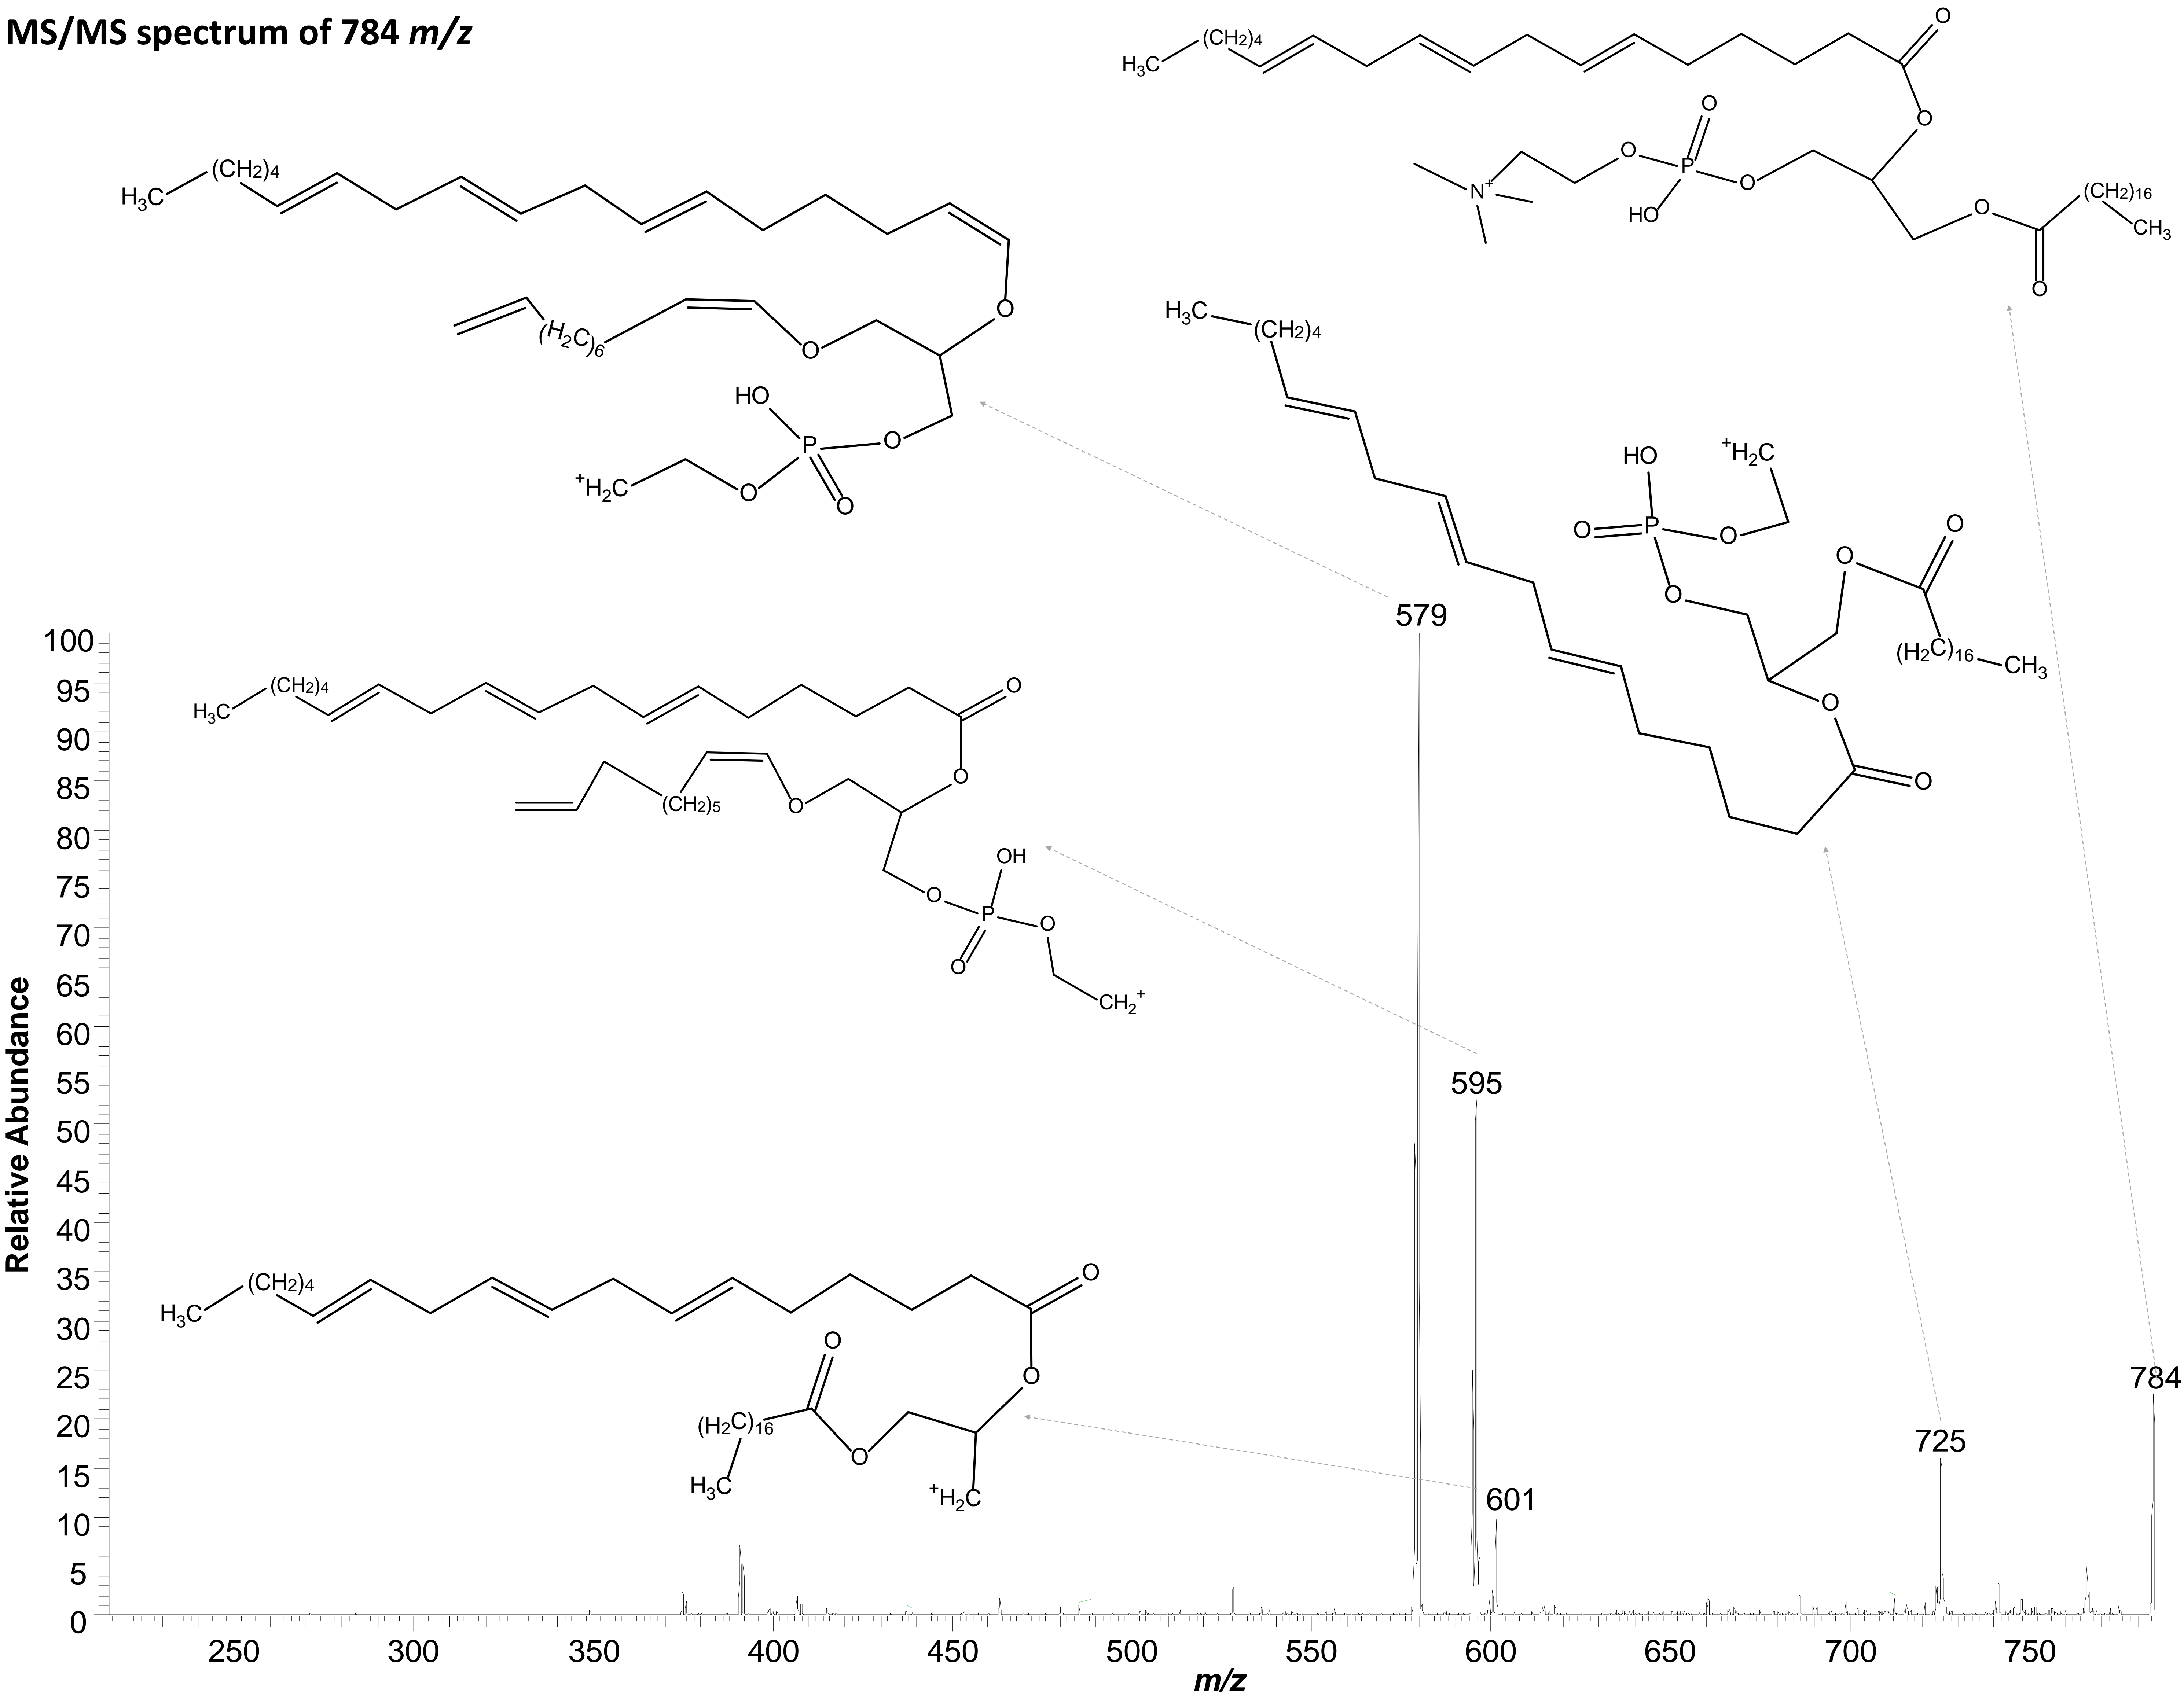



MS/MS spectrum of 838 *m/z*

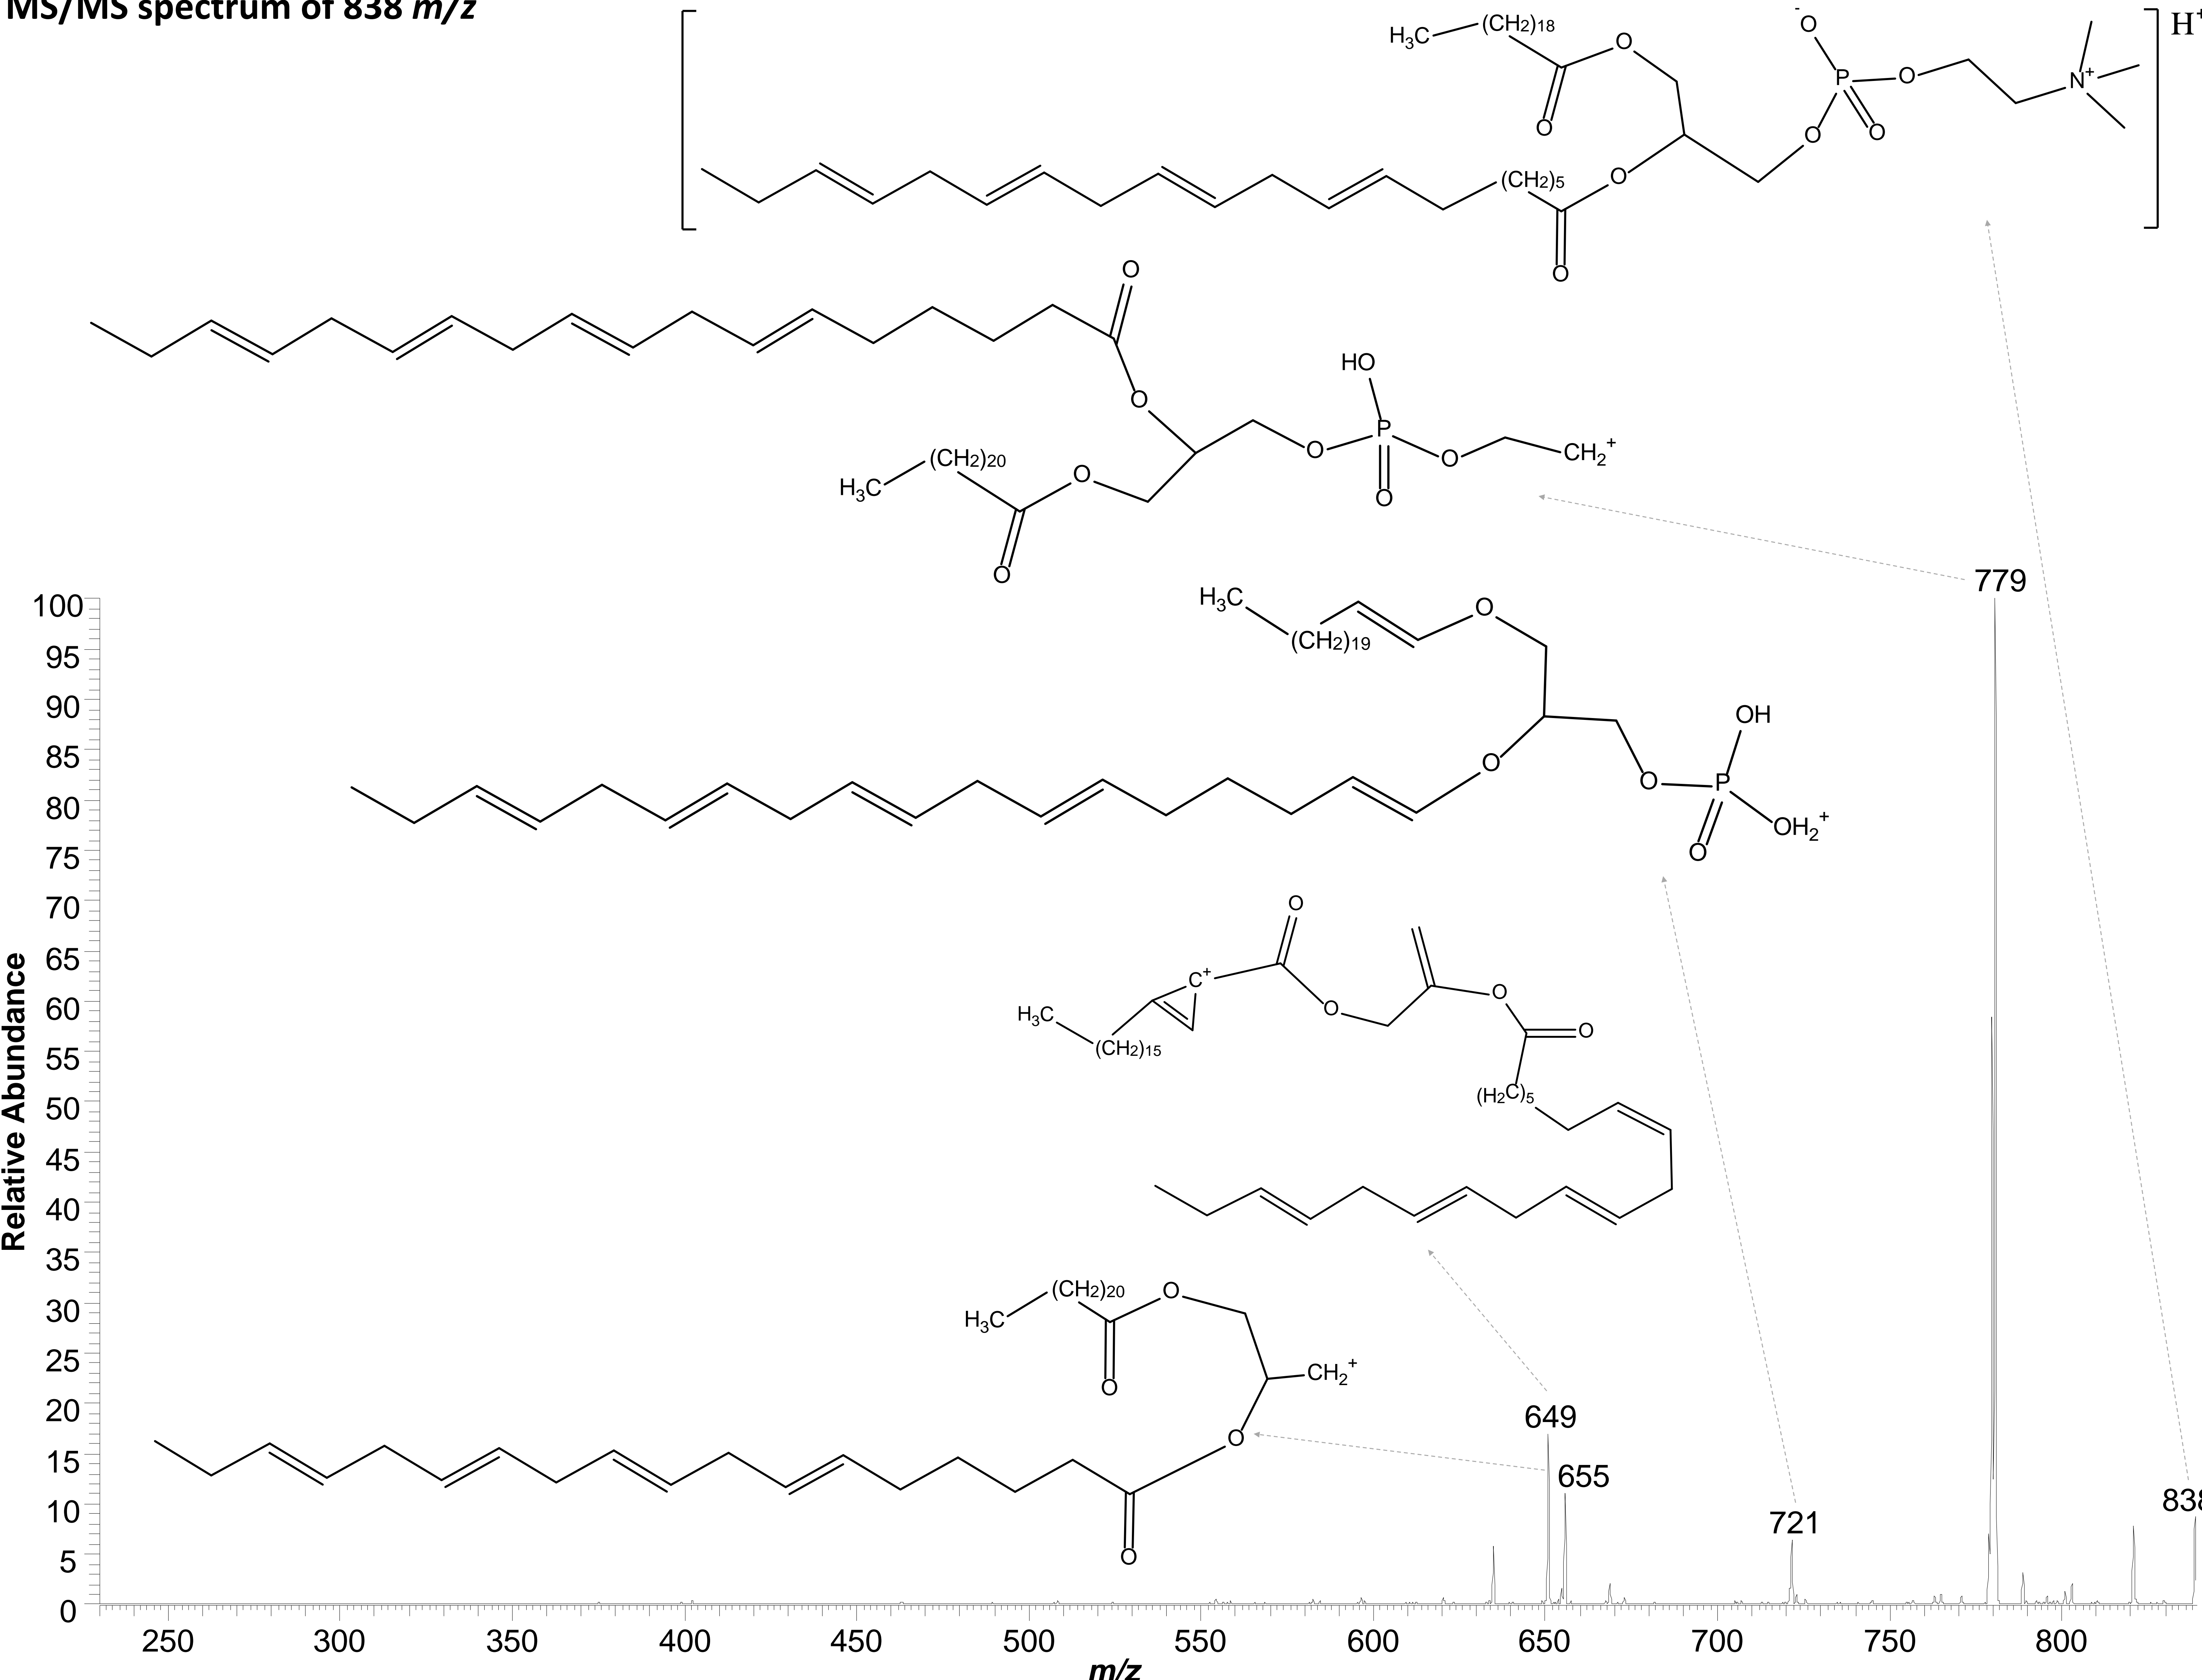

# MS/MS spectrum of 768 m/z

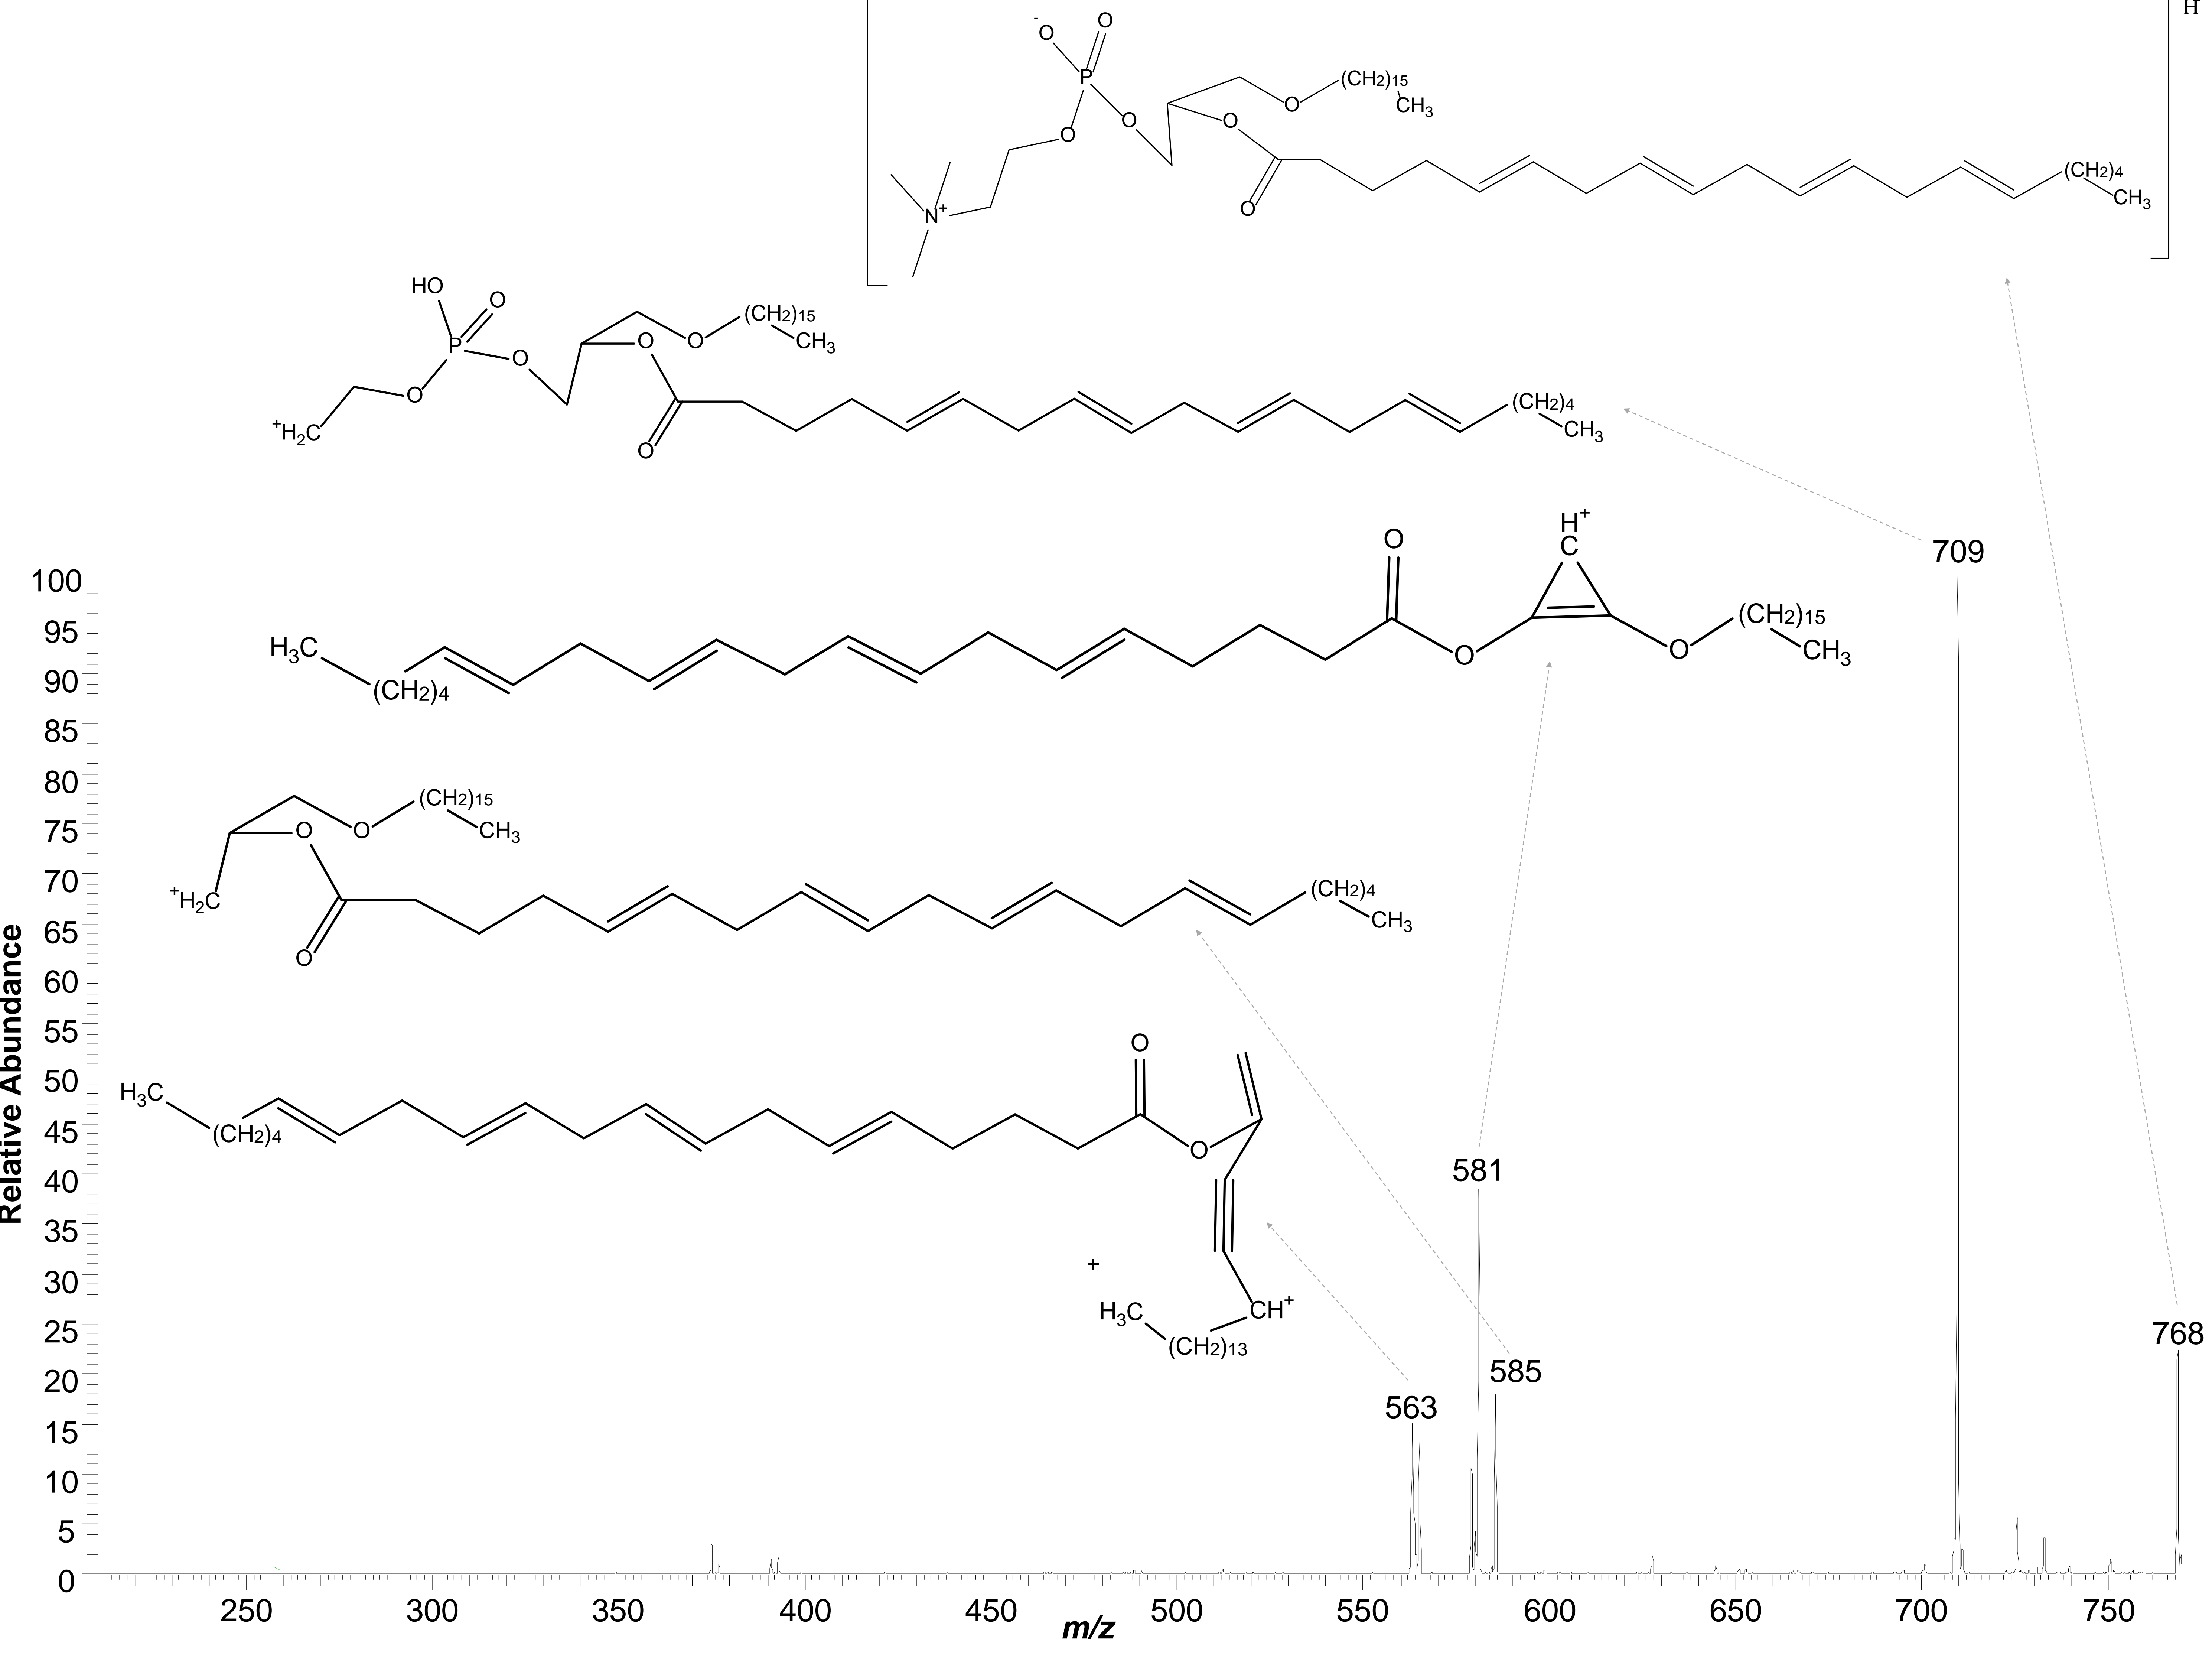

# MS/MS spectrum of 770 m/z

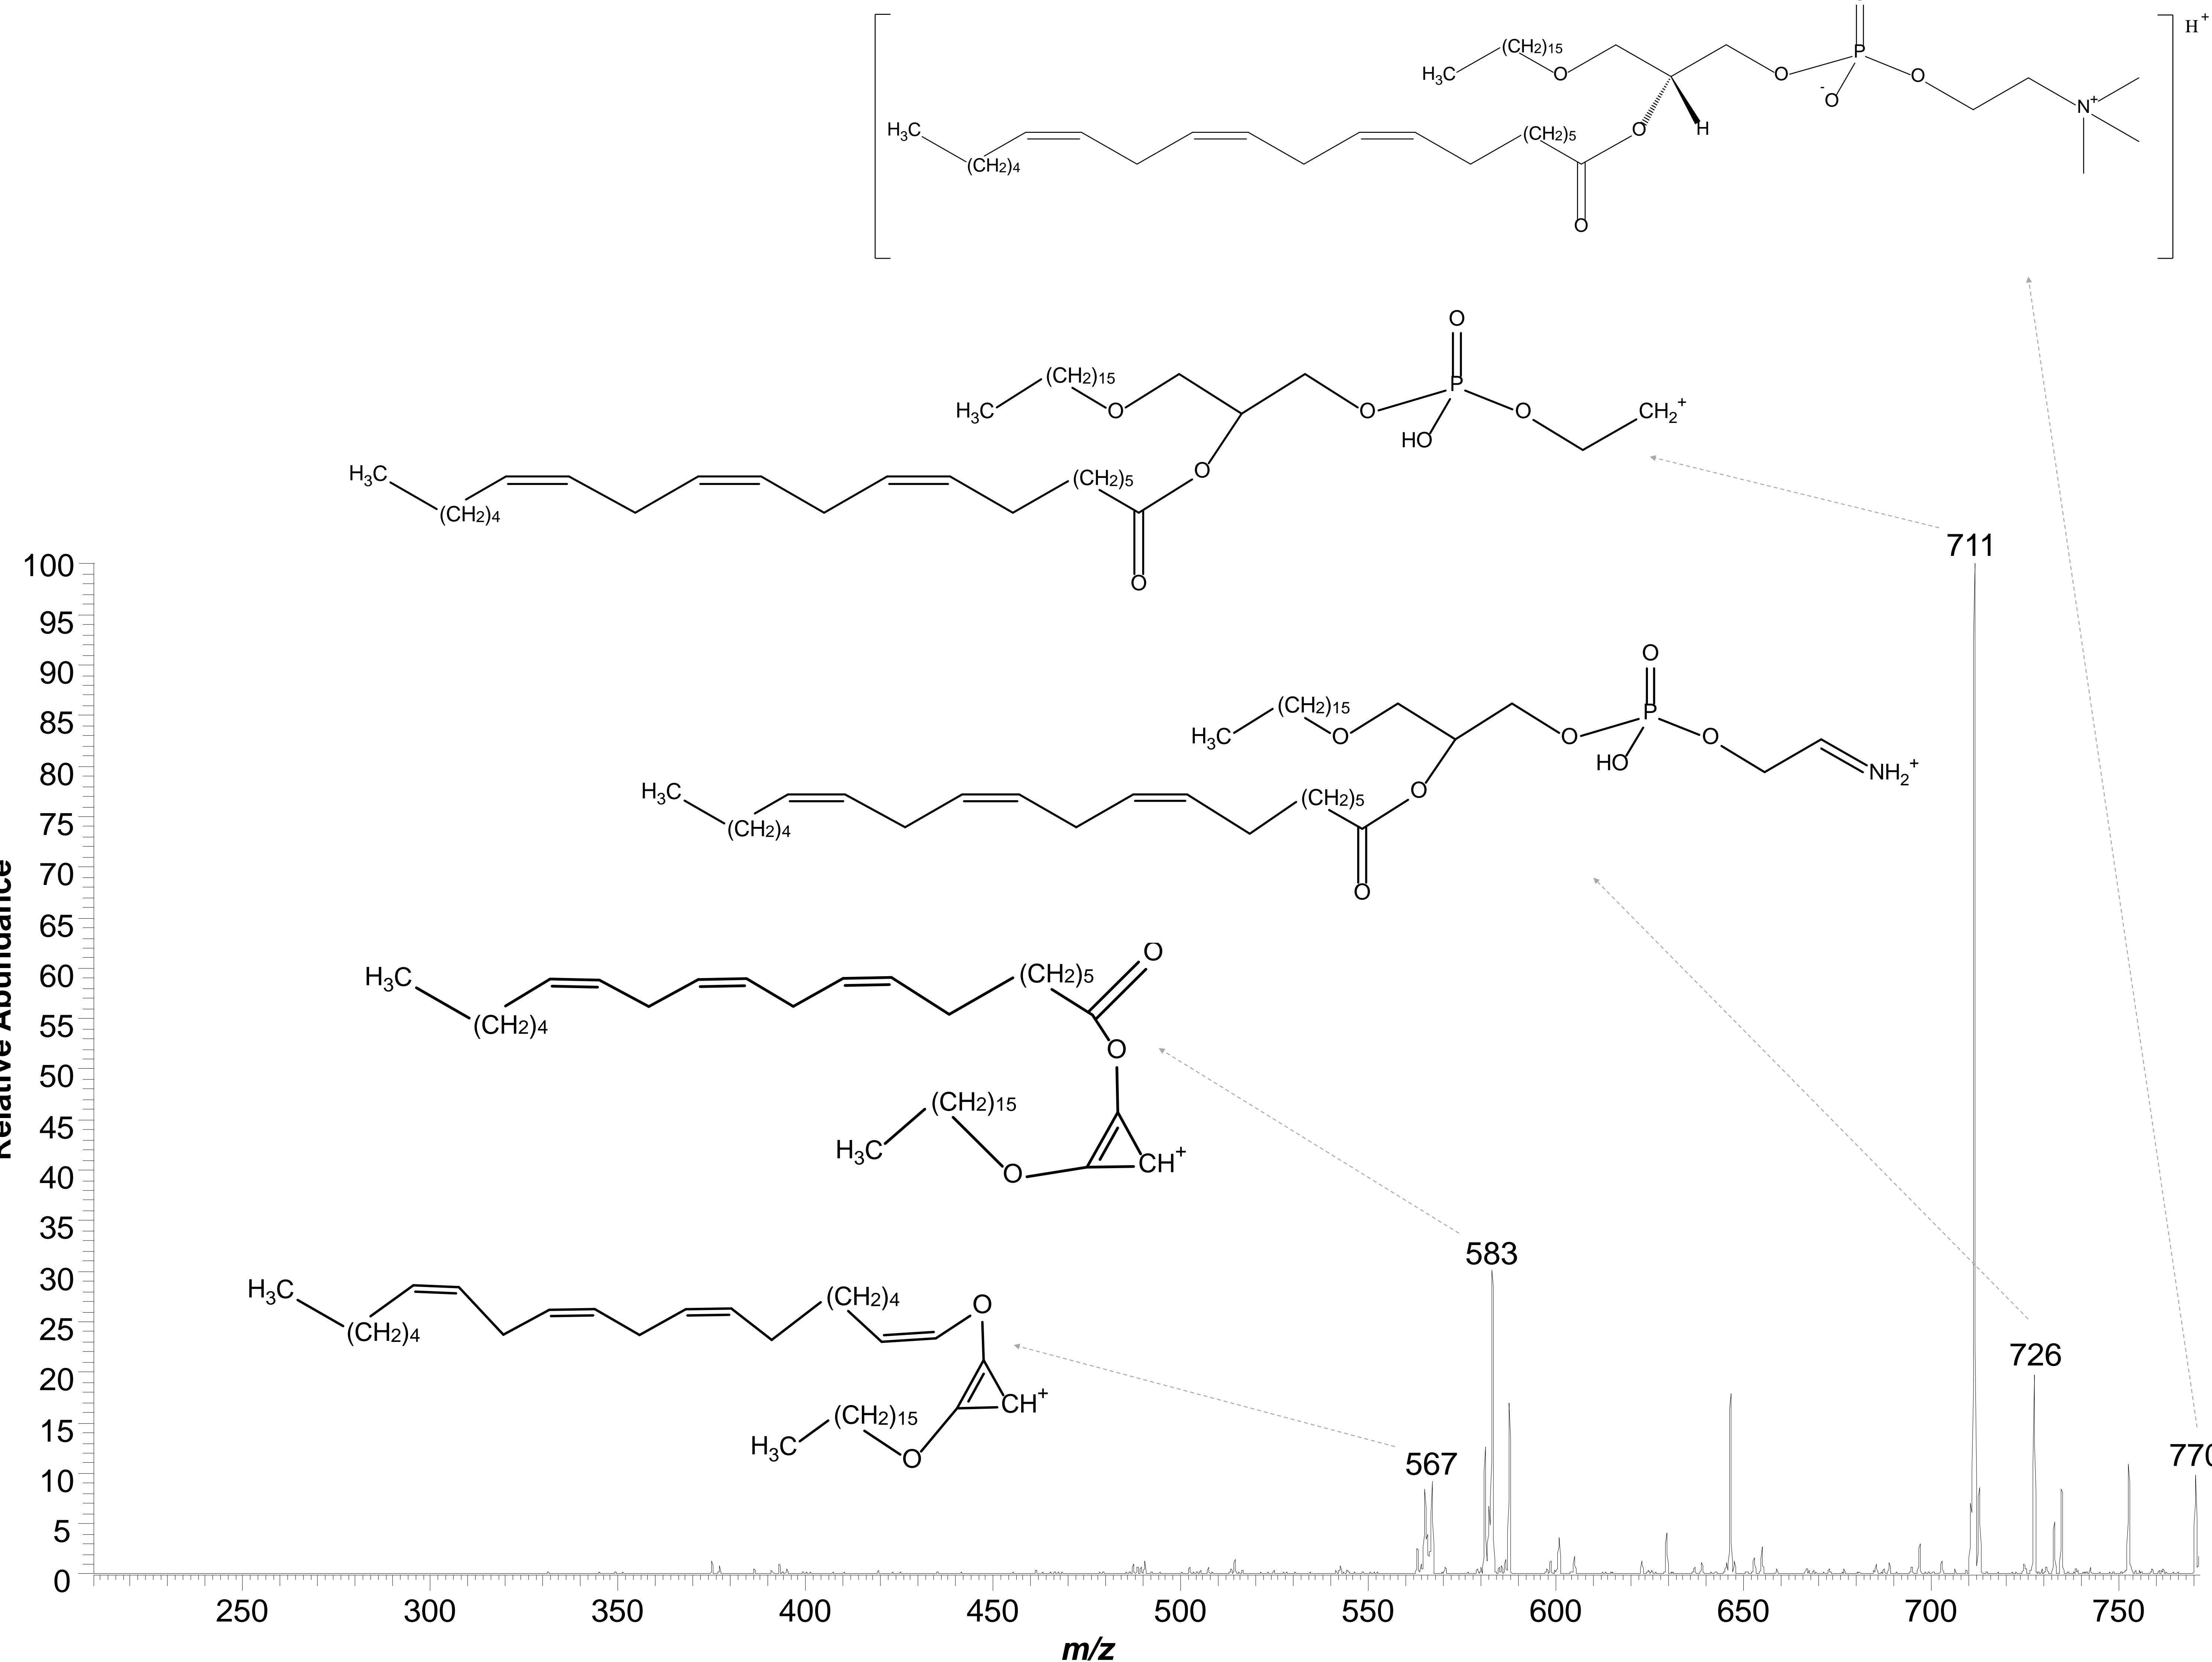

MS/MS spectrum of 792 *m/z*

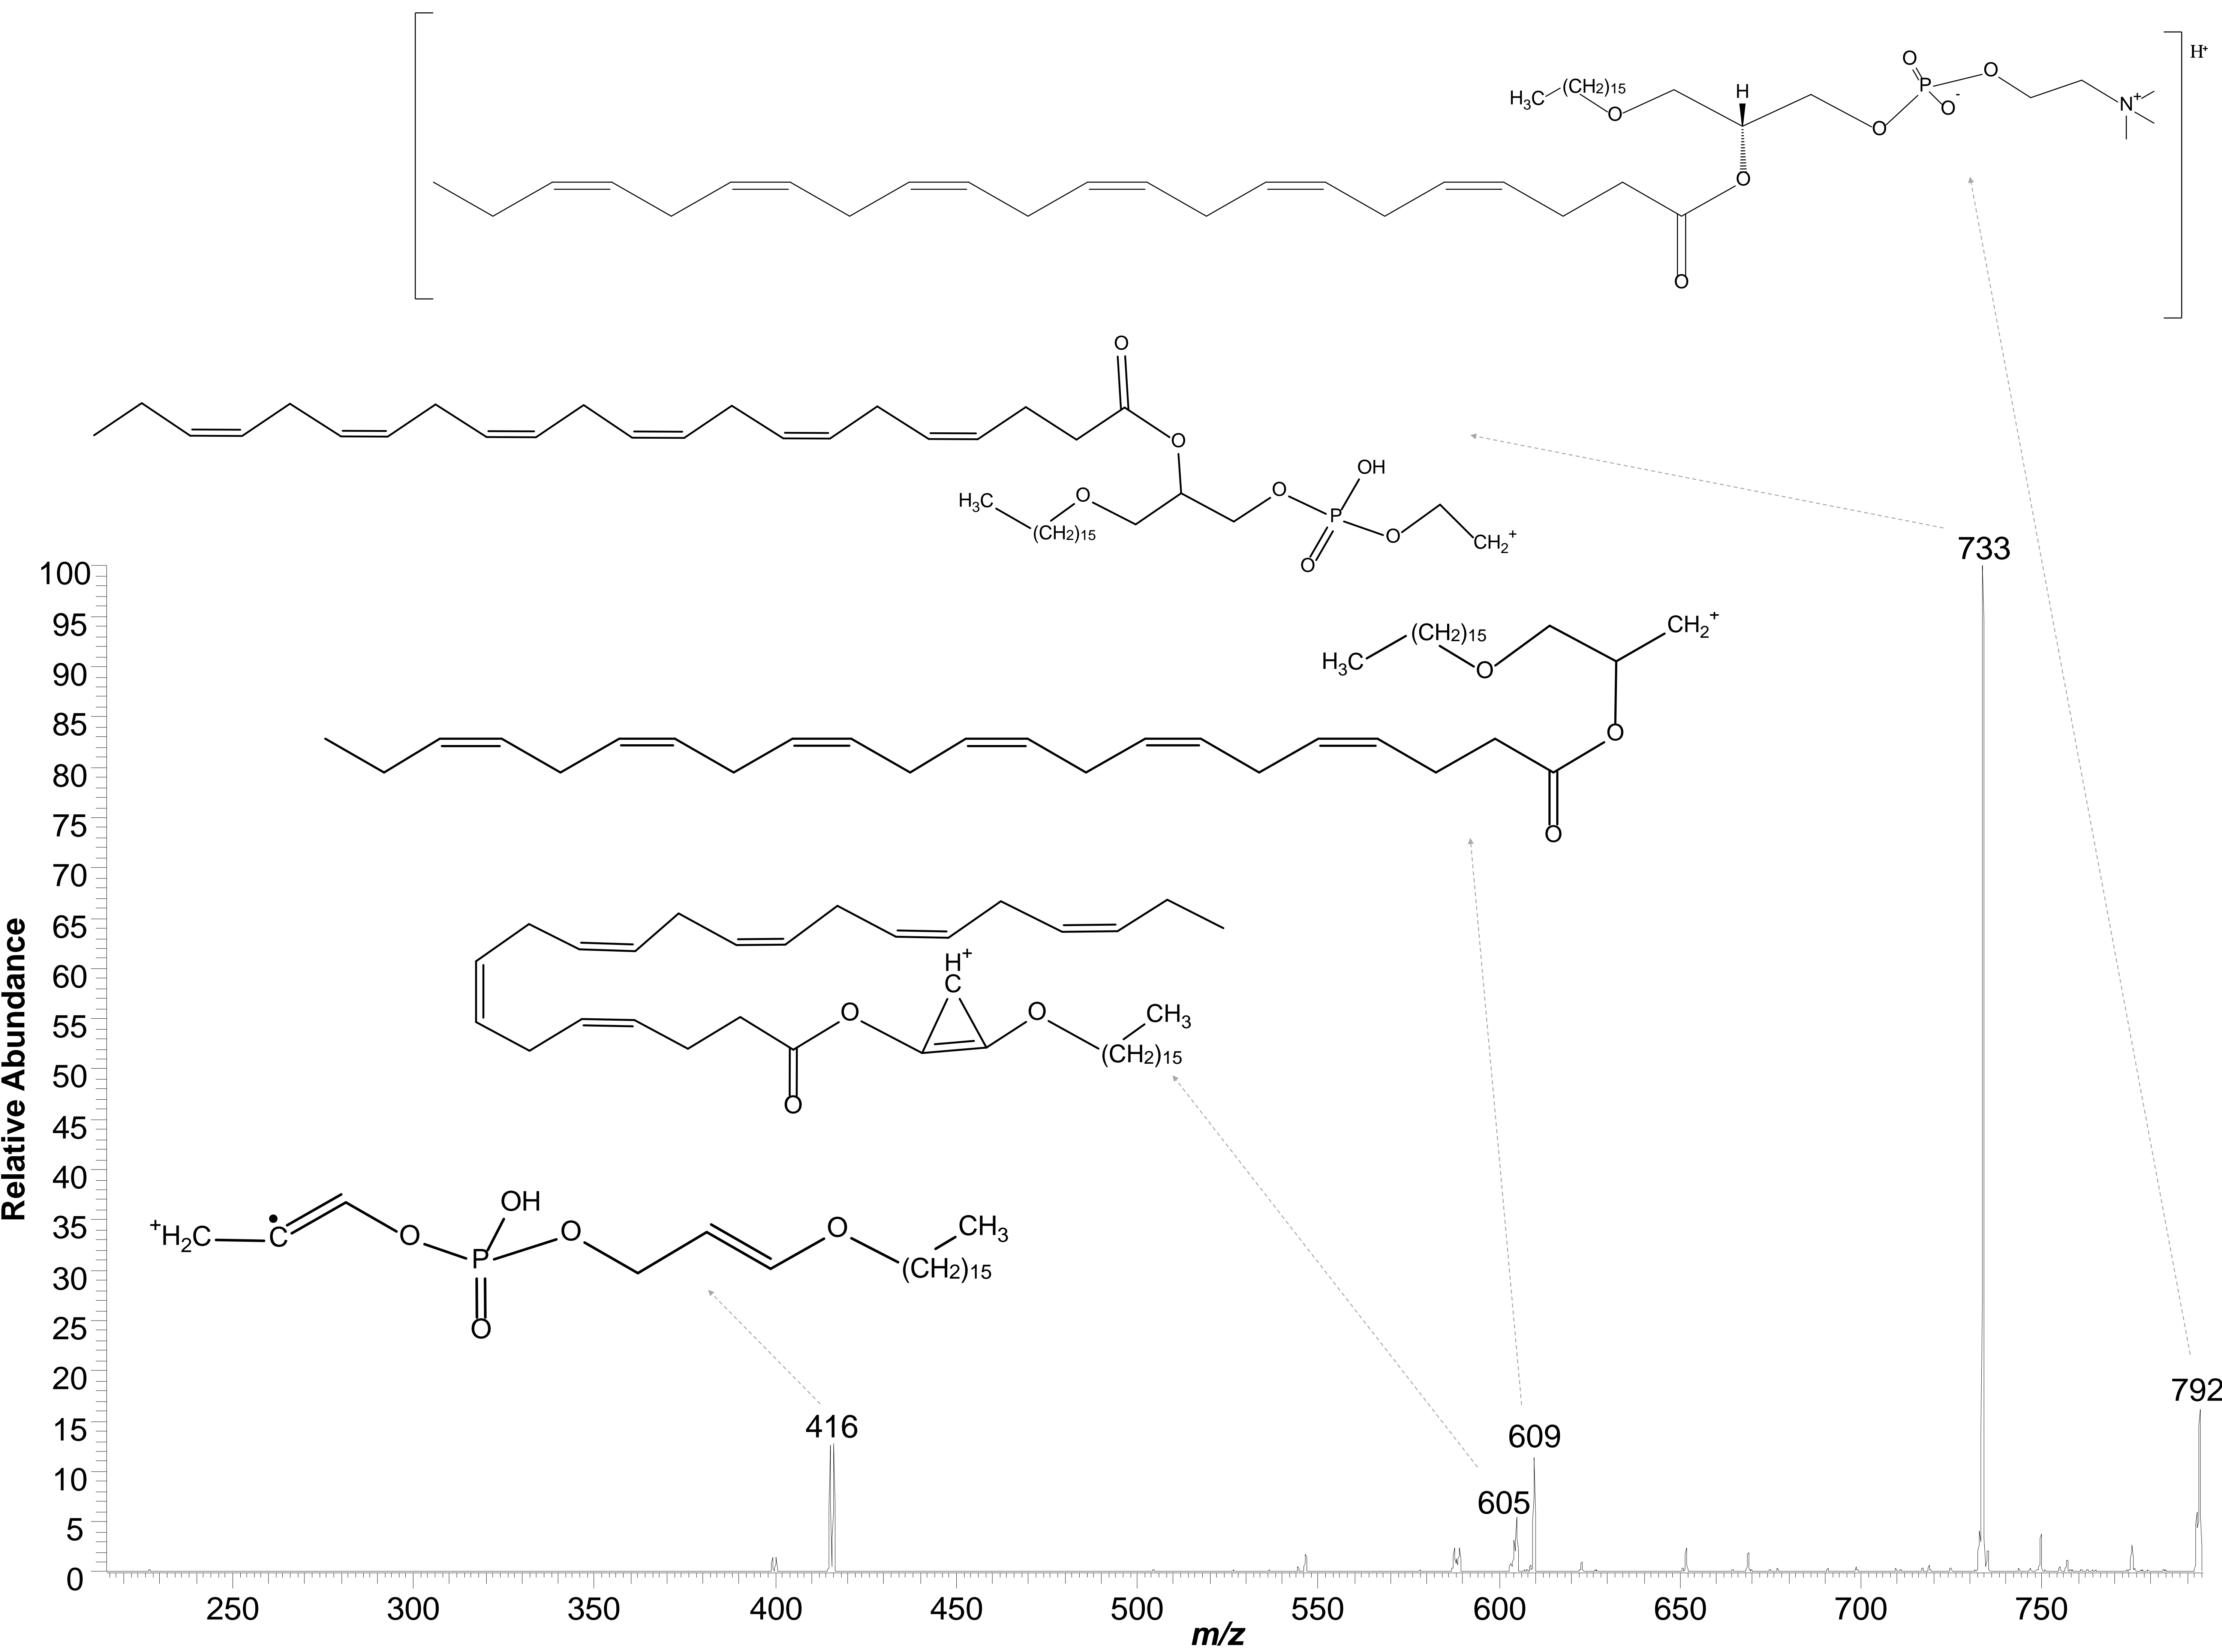

MS/MS spectrum of 798 m/z

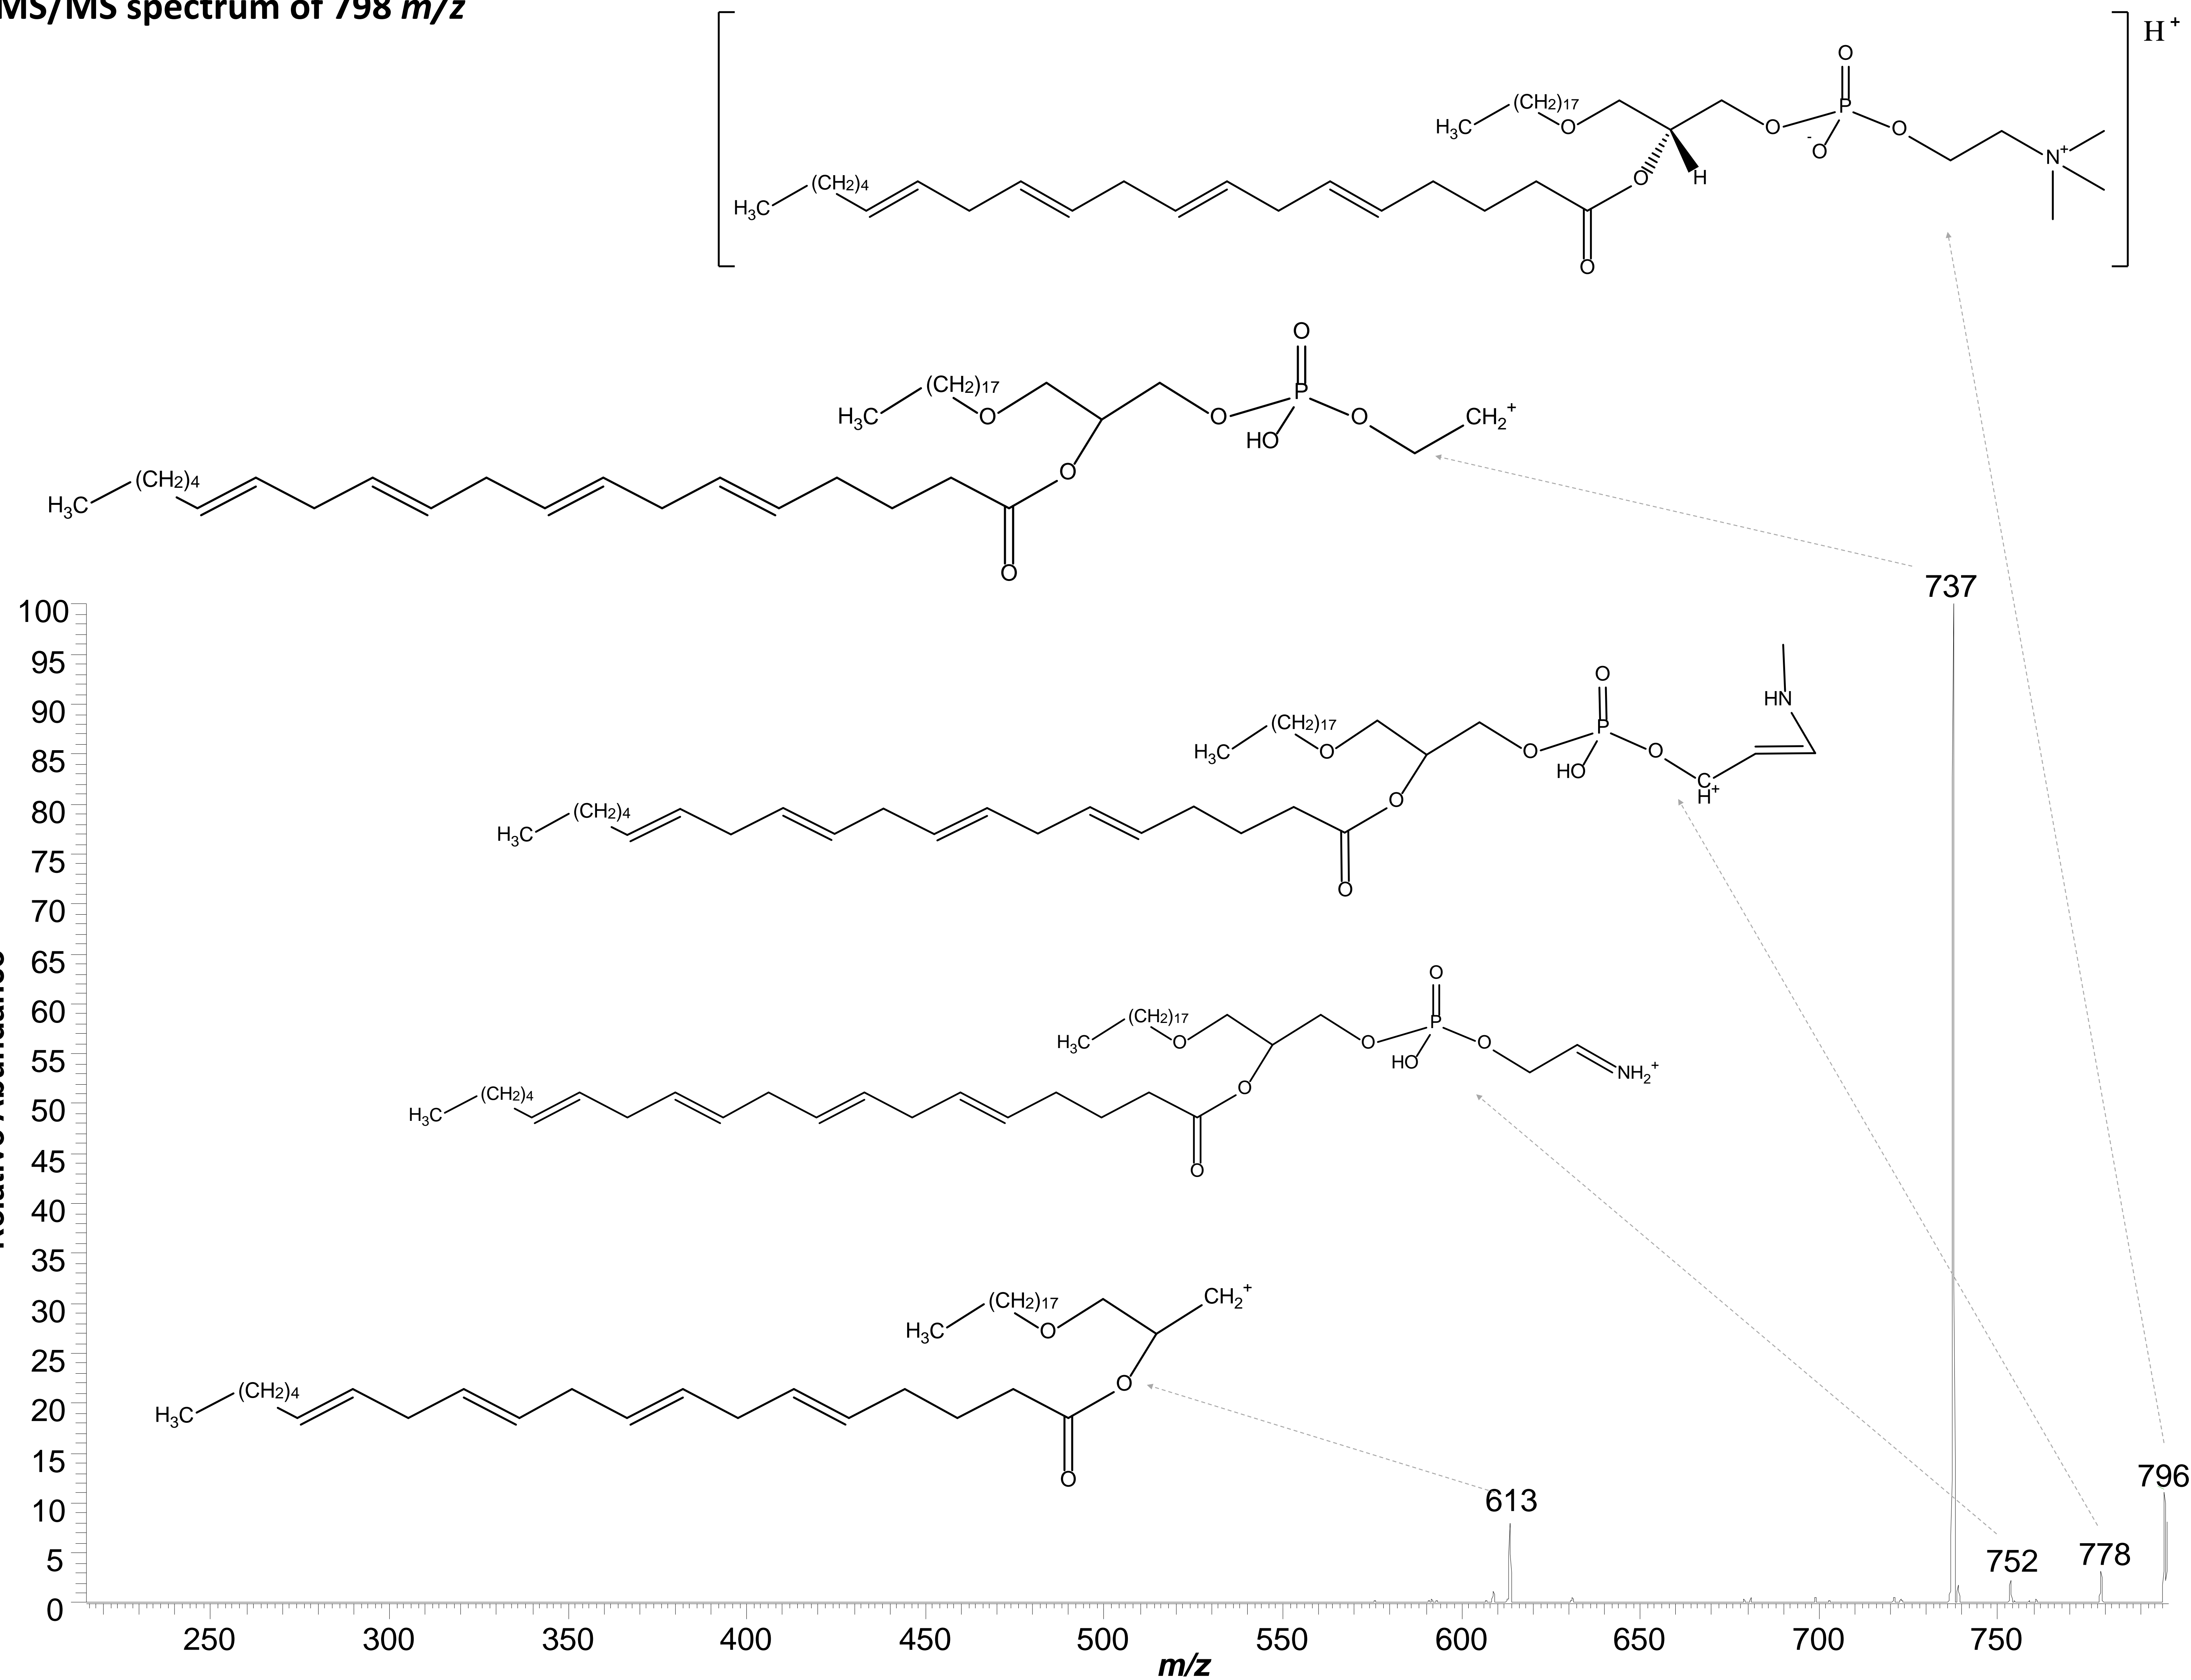

Supplement: 41598_2018_30385_MOESM1_ESM.pdf [file 41598_2018_30385_MOESM1_ESM.pdf]
